# Supplementary material for: Predicted fundamental niche expansion of Agarophyton vermiculophyllum under present and future climate scenarios
Source: Research Square preprint supplement (doi:10.21203/rs.3.rs-1327023/v1), 2022-03-08
Supplement: Supplementary file 1 [file d1ffba5b063bce04cb0ef40d.xlsx]

## Sheet: Locations
Site	Region	Location	Latitude	Longitude	References
Lake Akkeshi, Kushiro, Hokkaido	Native	Northwestern Pacific Ocean	43.0525	144.895	Ohmi (1956)
Gamejima, Japan	Native	Northwestern Pacific Ocean	36.1266	136.052	Ohmi (1956)
Takamatsu Bay, Shikoku Island, Japan	Native	Northwestern Pacific Ocean	34.4399	134.018	Yokoya et al. (1999)
Nagasaki, Japan	Native	Northwestern Pacific Ocean	32.8333	129.917	Raikar et al. (2001)
Hakodate City, Hokkaido, Japan	Native	Northwestern Pacific Ocean	41.7588	140.759	Terada and Yamamoto (2002)
Tsuruoka City, Yamagata Prefecture, Japan	Native	Northwestern Pacific Ocean	38.7972	139.671	Terada and Yamamoto (2002)
Kominato City, Chiba Prefecture, Japan	Native	Northwestern Pacific Ocean	35.1221	140.194	Terada and Yamamoto (2002)
Tosa City, Kochi Prefecture, Japan	Native	Northwestern Pacific Ocean	33.4471	133.468	Terada and Yamamoto (2002)
Akune City, Kagoshima Prefecture, Japan	Native	Northwestern Pacific Ocean	32.0574	130.167	Terada and Yamamoto (2002)
Onna Village, Okinawa Prefecture, Japan	Native	Northwestern Pacific Ocean	26.4997	127.823	Terada and Yamamoto (2002)
Bahía Todos Los Santos, Baja California, Mexico	Non-native	Northeastern Pacific Ocean	31.7168	-116.647	Bellorin et al. (2004)
Miyajima Island, Hiroshima, Japan	Native	Northwestern Pacific Ocean	34.2769	132.306	Bellorin et al. (2004)
The Belon estuary, Brittany, France	Non-native	Northeastern Atlantic Ocean	47.8024	-3.72956	Rueness (2005)
St-Pol-de-León, Brittany, France	Non-native	Northeastern Atlantic Ocean	48.6802	-3.95898	Rueness (2005)
Aber Wrac’h, Paluden, Brittany, France	Non-native	Northeastern Atlantic Ocean	48.5883	-4.51794	Rueness (2005)
Aber Benoît, Penn ar Pont, Brittany, France	Non-native	Northeastern Atlantic Ocean	48.5546	-4.53613	Rueness (2005)
Aber Benoît, Le Carpont, Brittany, France	Non-native	Northeastern Atlantic Ocean	48.5585	-4.58496	Rueness (2005)
L’Élorn, St-Jean, Brittany, France	Non-native	Northeastern Atlantic Ocean	48.3925	-4.3902	Rueness (2005)
Daoulas, Brittany, France	Non-native	Northeastern Atlantic Ocean	48.3535	-4.2789	Rueness (2005)
l’Aulne, Pont de Terenez, Brittany, France	Non-native	Northeastern Atlantic Ocean	48.2703	-4.26519	Rueness (2005)
Concarneau, Minaoët, Brittany, France	Non-native	Northeastern Atlantic Ocean	47.8586	-3.88233	Rueness (2005)
Lorient, Scorff, Brittany, France	Non-native	Northeastern Atlantic Ocean	47.7461	-3.34996	Rueness (2005)
Lorient, Blavet, Brittany, France	Non-native	Northeastern Atlantic Ocean	47.7633	-3.30448	Rueness (2005)
Étel, St-Hène, Brittany, France	Non-native	Northeastern Atlantic Ocean	47.6559	-3.20823	Rueness (2005)
Rivö, Styrsö, Gothenburg, Sweden	Non-native	Northeastern North Sea	57.655	11.7977	Rueness (2005)
Oostvoornse Meer, Oostvoorne, The Netherlands	Non-native	Southern North Sea	51.9277	4.06874	Rueness (2005)
Ria Formosa, Faro, Portugal	Non-native	Northeastern Atlantic Ocean	37.0182	-8.00304	Rueness (2005)
Bahía de A Coruña, Galicia, Spain	Non-native	Northeastern Atlantic Ocean	43.3987	-8.38626	Rueness (2005)
Little Cobb Island, Hog Island Bay, Virginia, USA	Non-native	Northwestern Atlantic Ocean	37.3728	-75.9414	Thomsen et al. (2005)
Oyster Harbor, Hog Island Bay, Virginia, USA	Non-native	Northwestern Atlantic Ocean	31.3683	-76.0275	Thomsen et al. (2005)
South end of Hog Island Bay, Virginia, USA	Non-native	Northwestern Atlantic Ocean	37.4439	-75.8061	Thomsen et al. (2005)
Masonboro Sound, New Hanover Co., North Carolina, USA	Non-native	Northwestern Atlantic Ocean	34.1482	-77.847	Freshwater et al. (2006b)
Carteret Co., North Carolina, USA	Non-native	Northwestern Atlantic Ocean	34.6923	-76.3647	Freshwater et al. (2006a)
Onslow Co., North Carolina, USA	Non-native	Northwestern Atlantic Ocean	34.5514	-77.2619	Freshwater et al. (2006a)
Pender Co., North Carolina, USA	Non-native	Northwestern Atlantic Ocean	34.3382	-77.6284	Freshwater et al. (2006a)
New Hanover Co., North Carolina, USA	Non-native	Northwestern Atlantic Ocean	34.1466	-77.8059	Freshwater et al. (2006a)
Brunswick Co., North Carolina, USA	Non-native	Northwestern Atlantic Ocean	33.8807	-78.2835	Freshwater et al. (2006a)
Cape Fear River estuary, , North Carolina, USA	Non-native	Northwestern Atlantic Ocean	33.8161	-77.9538	Freshwater et al. (2006a)
Kungälv C, Gothenburg, Sweden	Non-native	Northeastern North Sea	57.8	11.81	Nyberg (2006)
Hog Islnd Bay, Delmarva Peninsula, Virginia, USA	Non-native	Northwestern Atlantic Ocean	37.5513	-75.6711	Thomsen et al. (2006)
Hog Islnd Bay, Delmarva Peninsula, Virginia, USA	Non-native	Northwestern Atlantic Ocean	37.3163	-75.8929	Thomsen et al. (2006)
Hog Islnd Bay, Delmarva Peninsula, Virginia, USA	Non-native	Northwestern Atlantic Ocean	37.4633	-75.8072	Thomsen et al. (2006)
Hog Islnd Bay, Delmarva Peninsula, Virginia, USA	Non-native	Northwestern Atlantic Ocean	37.4579	-75.7988	Thomsen et al. (2006)
Hog Islnd Bay, Delmarva Peninsula, Virginia, USA	Non-native	Northwestern Atlantic Ocean	37.4232	-75.7433	Thomsen et al. (2006)
Hog Islnd Bay, Delmarva Peninsula, Virginia, USA	Non-native	Northwestern Atlantic Ocean	37.4766	-75.7534	Thomsen et al. (2006)
Hog Islnd Bay, Delmarva Peninsula, Virginia, USA	Non-native	Northwestern Atlantic Ocean	37.3992	-75.7282	Thomsen et al. (2006)
Hog Islnd Bay, Delmarva Peninsula, Virginia, USA	Non-native	Northwestern Atlantic Ocean	37.3591	-75.7467	Thomsen et al. (2006)
Hog Islnd Bay, Delmarva Peninsula, Virginia, USA	Non-native	Northwestern Atlantic Ocean	37.4516	-75.7917	Tyler and McGlathery (2006)
Hog Islnd Bay, Delmarva Peninsula, Virginia, USA	Non-native	Northwestern Atlantic Ocean	37.3194	-75.8339	Tyler and McGlathery (2006)
Hog Islnd Bay, Delmarva Peninsula, Virginia, USA	Non-native	Northwestern Atlantic Ocean	37.1685	-75.9231	Tyler and McGlathery (2006)
Hog Islnd Bay, Delmarva Peninsula, Virginia, USA	Non-native	Northwestern Atlantic Ocean	37.5933	-75.6422	Tyler and McGlathery (2006)
Wadden Sea National Park, Denmark	Non-native	Northeastern North Sea	55.0296	8.44306	Nehls (2007)
Wadden Sea National Park, Denmark	Non-native	Northeastern North Sea	54.9663	8.38251	Nehls (2007)
Wadden Sea National Park, Denmark	Non-native	Northeastern North Sea	54.8352	8.33264	Nehls (2007)
Wadden Sea National Park, Denmark	Non-native	Northeastern North Sea	54.8455	8.4484	Nehls (2007)
Wadden Sea National Park, Denmark	Non-native	Northeastern North Sea	54.8711	8.58197	Nehls (2007)
Wadden Sea National Park, Denmark	Non-native	Northeastern North Sea	54.788	8.32017	Nehls (2007)
Wadden Sea National Park, Denmark	Non-native	Northeastern North Sea	54.6893	8.41278	Nehls (2007)
Wadden Sea National Park, Denmark	Non-native	Northeastern North Sea	54.6996	8.65499	Nehls (2007)
Wadden Sea National Park, Denmark	Non-native	Northeastern North Sea	54.6131	8.411	Nehls (2007)
Wadden Sea National Park, Denmark	Non-native	Northeastern North Sea	54.5666	8.45018	Nehls (2007)
Wadden Sea National Park, Denmark	Non-native	Northeastern North Sea	54.5326	8.53567	Nehls (2007)
Wadden Sea National Park, Denmark	Non-native	Northeastern North Sea	54.4757	8.52854	Nehls (2007)
Wadden Sea National Park, Denmark	Non-native	Northeastern North Sea	54.4943	8.64609	Nehls (2007)
Wadden Sea National Park, Denmark	Non-native	Northeastern North Sea	54.4943	8.64609	Nehls (2007)
Wadden Sea National Park, Denmark	Non-native	Northeastern North Sea	54.5955	8.73157	Nehls (2007)
Wadden Sea National Park, Denmark	Non-native	Northeastern North Sea	54.6419	8.73513	Nehls (2007)
Wadden Sea National Park, Denmark	Non-native	Northeastern North Sea	54.5191	8.82774	Nehls (2007)
Rivö, Gothenburg, Sweden	Non-native	Northeastern North Sea	57.6591	11.7935	Nyberg (2007)
Träslövsläge, Sweden	Non-native	Northeastern North Sea	57.0536	12.2636	Nyberg (2007)
Kiel, Germany	Non-native	Northeastern North Sea	54.3482	10.1636	Nyberg (2007)
Rivö, Gothenburg, Sweden	Non-native	Northeastern North Sea	57.6511	11.785	Nyberg (2007)
Askim, Gothenburg, Sweden	Non-native	Northeastern North Sea	57.5842	11.9022	Nyberg (2007)
Vallda, Kungsbacka, Sweden	Non-native	Northeastern North Sea	57.4833	11.9339	Nyberg (2007)
Koster Islands, Sweden	Non-native	Northeastern North Sea	58.3545	11.4094	Nyberg (2007)
Halland, Sweden	Non-native	Northeastern North Sea	57.0637	12.2777	Nyberg (2007)
Gothenburg Islands, Sweden	Non-native	Northeastern North Sea	57.6058	11.7363	Nyberg (2007)
Brofjorden, Sweden	Non-native	Northeastern North Sea	58.3591	11.4236	Nyberg (2007)
Träslövsläge, Sweden	Non-native	Northeastern North Sea	57.0537	12.2624	Nyberg (2007)
Yatsushiro, Kumamoto Prefecture, Japan	Native	Northwestern Pacific Ocean	32.5648	130.53	Phooprong et al. (2007)
Hamamustu, Shizuoka Prefecture, Japan	Native	Northwestern Pacific Ocean	34.6432	137.682	Phooprong et al. (2007)
Yamada, Iwate Prefecture, Japan	Native	Northwestern Pacific Ocean	39.4661	141.992	Phooprong et al. (2007)
Horsen Fjord, Denmark	Non-native	Northeastern North Sea	55.883	10.0814	Thomsen et al. (2007a)
Horsen Fjord, Denmark	Non-native	Northeastern North Sea	55.8796	10.0813	Thomsen et al. (2007a)
Horsen Fjord, Denmark	Non-native	Northeastern North Sea	55.8779	10.0455	Thomsen et al. (2007a)
Horsen Fjord, Denmark	Non-native	Northeastern North Sea	55.8758	10.004	Thomsen et al. (2007a)
Horsen Fjord, Denmark	Non-native	Northeastern North Sea	55.8653	9.9685	Thomsen et al. (2007a)
Horsen Fjord, Denmark	Non-native	Northeastern North Sea	55.8565	9.9183	Thomsen et al. (2007a)
Horsen Fjord, Denmark	Non-native	Northeastern North Sea	55.8569	9.9138	Thomsen et al. (2007a)
Horsen Fjord, Denmark	Non-native	Northeastern North Sea	55.8627	9.8941	Thomsen et al. (2007a)
Horsen Fjord, Denmark	Non-native	Northeastern North Sea	55.8616	9.8881	Thomsen et al. (2007a)
Horsen Fjord, Denmark	Non-native	Northeastern North Sea	55.8599	9.8782	Thomsen et al. (2007a)
Horsen Fjord, Denmark	Non-native	Northeastern North Sea	55.8464	9.8884	Thomsen et al. (2007a)
Horsen Fjord, Denmark	Non-native	Northeastern North Sea	55.8449	9.8936	Thomsen et al. (2007a)
Horsen Fjord, Denmark	Non-native	Northeastern North Sea	55.8368	9.9392	Thomsen et al. (2007a)
Horsen Fjord, Denmark	Non-native	Northeastern North Sea	55.8284	9.9885	Thomsen et al. (2007a)
Horsen Fjord, Denmark	Non-native	Northeastern North Sea	55.827	10.0073	Thomsen et al. (2007a)
Horsen Fjord, Denmark	Non-native	Northeastern North Sea	55.8326	10.0159	Thomsen et al. (2007a)
Horsen Fjord, Denmark	Non-native	Northeastern North Sea	55.8183	10.0547	Thomsen et al. (2007a)
Horsen Fjord, Denmark	Non-native	Northeastern North Sea	55.858	9.8797	Thomsen et al. (2007a)
Horsen Fjord, Denmark	Non-native	Northeastern North Sea	55.852	9.8999	Thomsen et al. (2007a)
Horsen Fjord, Denmark	Non-native	Northeastern North Sea	55.8494	9.9219	Thomsen et al. (2007a)
Horsen Fjord, Denmark	Non-native	Northeastern North Sea	55.849	9.9672	Thomsen et al. (2007a)
Horsen Fjord, Denmark	Non-native	Northeastern North Sea	55.8487	9.9993	Thomsen et al. (2007a)
Horsen Fjord, Denmark	Non-native	Northeastern North Sea	55.8577	10.0173	Thomsen et al. (2007a)
Horsen Fjord, Denmark	Non-native	Northeastern North Sea	55.8745	10.0714	Thomsen et al. (2007a)
Horsen Fjord, Denmark	Non-native	Northeastern North Sea	55.8774	10.0504	Thomsen et al. (2007a)
Horsen Fjord, Denmark	Non-native	Northeastern North Sea	55.8713	10.0274	Thomsen et al. (2007a)
Horsen Fjord, Denmark	Non-native	Northeastern North Sea	55.8636	10.0026	Thomsen et al. (2007a)
Horsen Fjord, Denmark	Non-native	Northeastern North Sea	55.8578	9.9593	Thomsen et al. (2007a)
Horsen Fjord, Denmark	Non-native	Northeastern North Sea	55.8589	9.9259	Thomsen et al. (2007a)
Horsen Fjord, Denmark	Non-native	Northeastern North Sea	55.8432	9.9083	Thomsen et al. (2007a)
Horsen Fjord, Denmark	Non-native	Northeastern North Sea	55.8325	9.9719	Thomsen et al. (2007a)
Horsen Fjord, Denmark	Non-native	Northeastern North Sea	55.8346	10.0125	Thomsen et al. (2007a)
Horsen Fjord, Denmark	Non-native	Northeastern North Sea	55.8357	10.0645	Thomsen et al. (2007a)
Horsen Fjord, Denmark	Non-native	Northeastern North Sea	55.8361	9.9313	Thomsen et al. (2007a)
Horsen Fjord, Denmark	Non-native	Northeastern North Sea	55.8302	10.0038	Thomsen et al. (2007a)
Horsen Fjord, Denmark	Non-native	Northeastern North Sea	55.831	10.0304	Thomsen et al. (2007a)
Wadden Sea, Germany	Non-native	Northeastern North Sea	54.9	8.32	Thomsen et al. (2007a)
Horsens Fjord, Denmark	Non-native	Northeastern North Sea	55.85	10	Thomsen et al. (2007a)
Vejle Fjord, Denmark	Non-native	Northeastern North Sea	55.6739	9.71841	Thomsen et al. (2007a)
Limfjorden, Denmark	Non-native	Northeastern North Sea	57.07	9.65	Thomsen et al. (2007a)
Kiel Bay, Germany	Non-native	Northeastern North Sea	54.41	10.17	Thomsen et al. (2007a)
Wadden Sea National Park, Denmark	Non-native	Northeastern North Sea	55.33	8.54	Thomsen et al. ( 2007a)
Holckenhavn Fjord, Denmark	Non-native	Northeastern North Sea	55.34	10.79	Thomsen et al. (2007a)
Øster Hurup Harbor, Denmark	Non-native	Northeastern North Sea	56.83	10.3	Thomsen et al. (2007a)
Egense Harbor, Denmark	Non-native	Northeastern North Sea	57.03	10.32	Thomsen et al. (2007a)
Kattegat coast, Sweden	Non-native	Northeastern North Sea	56.9079	11.3979	Thomsen et al. (2007b)
Northern Belt Sea, Denmark	Non-native	Northeastern North Sea	55.5454	10.9083	Thomsen et al. (2007b)
El Yadida, Sidi Moussa, Morocco	Non-native	Northeastern Atlantic Ocean	33.2525	-8.49889	Guillemin et al. (2008)
Kiel Fjord, Germany	Non-native	Northeastern North Sea	54.367	10.1798	Weinberger et al. (2008)
Glücksburg, Germany	Non-native	Northeastern North Sea	54.8333	9.51667	Weinberger et al. (2008)
Warnemünde, Rostock, Germany	Non-native	Northeastern North Sea	54.2517	12.05	Weinberger et al. (2008)
Wik, Kiel, Germany	Non-native	Northeastern North Sea	54.3531	10.1414	Weinberger et al. (2008)
Vallda, Kungsbacka, Sweden	Non-native	Northeastern North Sea	57.4833	11.9339	Nyberg and Wallentinus (2009)
Rivö, Gothenburg, Sweden	Non-native	Northeastern North Sea	57.6511	11.785	Nyberg and Wallentinus (2009)
Askim, Gothenburg, Sweden	Non-native	Northeastern North Sea	57.5842	11.9022	Nyberg and Wallentinus (2009)
Vallda, Kungsbacka, Sweden	Non-native	Northeastern North Sea	57.4833	11.9339	Nyberg and Wallentinus (2009)
Vallda, Kungsbacka, Sweden	Non-native	Northeastern North Sea	57.4833	11.9339	Nyberg and Wallentinus (2009)
Vallda, Kungsbacka, Sweden	Non-native	Northeastern North Sea	57.4833	11.9339	Nyberg and Wallentinus (2009)
Vallda, Kungsbacka, Sweden	Non-native	Northeastern North Sea	57.4833	11.9339	Nyberg and Wallentinus (2009)
Koaster Islands, Sweden	Non-native	Northeastern North Sea	58.3545	11.4094	Nyberg et al (2009)
Halland, Sweden	Non-native	Northeastern North Sea	57.0637	12.2777	Nyberg et al (2009)
Danish Wadden Sea, Denmark	Non-native	Northeastern North Sea	55.2434	8.48251	Nyberg et al (2009)
Western Mandø, Denmark	Non-native	Northeastern North Sea	57.5104	11.9388	Nyberg et al (2009)
Snaptun Harbour, Denmark	Non-native	Northeastern North Sea	57.4832	11.9428	Nyberg et al (2009)
Holckenhavn Fjord, Denmark	Non-native	Northeastern North Sea	57.6261	11.8778	Nyberg et al (2009)
Särö, Sweden	Non-native	Northeastern North Sea	57.2866	8.51681	Nyberg et al (2009)
Sandö, Sweden	Non-native	Northeastern North Sea	55.8159	10.055	Nyberg et al (2009)
Lerkil Harbour, Sweden	Non-native	Northeastern North Sea	55.854	9.87578	Nyberg et al (2009)
Rorvik, Sweden	Non-native	Northeastern North Sea	55.289	10.7785	Nyberg et al (2009)
Norrevang, Denmark	Non-native	Northeastern North Sea	57.4523	11.9154	Nyberg et al (2009)
North Hog Island, Virginia, USA	Non-native	Northeastern Atlantic Ocean	37.475	-75.6828	Nyberg et al (2009)
South Hog Island, Virginia, USA	Non-native	Northeastern Atlantic Ocean	37.3714	-75.7283	Nyberg et al (2009)
Fisherman Island, Virginia, USA	Non-native	Northeastern Atlantic Ocean	37.1083	-75.9694	Nyberg et al (2009)
South Bay, Virginia, USA	Non-native	Northeastern Atlantic Ocean	37.2903	-75.8533	Nyberg et al (2009)
Bamfield Inlet, British Columbia, Canada	Non-native	Northeastern Pacific Ocean	48.8289	-125.138	Saunders (2009)
Bamfield Inlet, British Columbia, Canada	Non-native	Northeastern Pacific Ocean	48.8419	-125.137	Saunders (2009)
Courtenay Estuary, Courtenay, Canada	Non-native	Northeastern Pacific Ocean	49.6771	-124.974	Saunders (2009)
Courtenay Estuary, Courtenay, Canada	Non-native	Northeastern Pacific Ocean	49.6771	-124.974	Saunders (2009)
Courtenay Estuary, Courtenay, Canada	Non-native	Northeastern Pacific Ocean	49.6771	-124.974	Saunders (2009)
Courtenay Estuary, Courtenay, Canada	Non-native	Northeastern Pacific Ocean	49.6771	-124.974	Saunders (2009)
Shoreline Park, Port Moody, Canada	Non-native	Northeastern Pacific Ocean	49.2818	-122.836	Saunders (2009)
Tahsis, British Columbia, Canada	Non-native	Northeastern Pacific Ocean	49.9215	-126.657	Saunders (2009)
Tahsis, British Columbia, Canada	Non-native	Northeastern Pacific Ocean	49.9215	-126.657	Saunders (2009)
Ría do Burgo, A Coruña, Galicia, Spain	Non-native	Northeastern Atlantic Ocean	43.3226	-8.3689	Saunders (2009)
Ría de Foz, Lugo, Galicia, Spain	Non-native	Northeastern Atlantic Ocean	43.5609	-7.24823	Saunders (2009)
Ria de Aveiro, Portugal	Non-native	Northeastern Atlantic Ocean	40.6587	-8.70372	Saunders (2009)
Ria de Aveiro, Portugal	Non-native	Northeastern Atlantic Ocean	40.6497	-8.73524	Saunders (2009)
Ria de Aveiro, Portugal	Non-native	Northeastern Atlantic Ocean	40.6505	-8.6985	Saunders (2009)
Ria de Aveiro, Portugal	Non-native	Northeastern Atlantic Ocean	40.6408	-8.73054	Saunders (2009)
Budlong Farm, Greenwich Bay, Rhode Island, USA	Non-native	Northeastern Atlantic Ocean	41.6861	-71.4248	Saunders (2009)
Knowles Way Extension, Pt. Judith Pond, Rhode Island, USA	Non-native	Northeastern Atlantic Ocean	41.3894	-71.4945	Saunders (2009)
Oakland Beach, Greenwich Bay, Rhode Island, USA	Non-native	Northeastern Atlantic Ocean	41.6833	-71.3979	Saunders (2009)
Oakland Beach, Greenwich Bay, Rhode Island, USA	Non-native	Northeastern Atlantic Ocean	41.6879	-71.4039	Saunders (2009)
North Frisian Wadden Sea, Germany	Non-native	Northeastern North Sea	54.7502	8.00851	Schories et al. (2009)
East Frisian Wadden Sea, Germany	Non-native	Northeastern North Sea	54.0625	7.85937	Schories et al. (2009)
Western Baltic Sea, Germany	Non-native	Northeastern North Sea	54.2694	11.5249	Schories et al. (2009)
Kieler Bay, Germany	Non-native	Northeastern North Sea	54.5223	10.3527	Schories et al. (2009)
Island of Fehmarn, Germany	Non-native	Northeastern North Sea	54.5072	11.2466	Schories et al. (2009)
Lagoons of Khasan, Rusia	Native	Northwestern Japan Sea	42.45	130.608	Skriptsova and Choi (2009)
Lagoons of Khasan, Rusia	Native	Northwestern Japan Sea	42.45	130.608	Skriptsova and Choi (2009)
Lagoons of Khasan, Rusia	Native	Northwestern Japan Sea	42.45	130.608	Skriptsova and Choi (2009)
Lazurnaya Bay, Rusia	Native	Northwestern Japan Sea	43.0333	132.05	Skriptsova and Choi (2009)
Cape Rechnoy, Rusia	Native	Northwestern Japan Sea	43.3	131.817	Skriptsova and Choi (2009)
Lagoons of Khasan, Rusia	Native	Northwestern Japan Sea	42.45	130.608	Skriptsova and Choi (2009)
Japan Sea, North Korea	Native	Northwestern Japan Sea	41.45	130.767	Skriptsova and Choi (2009)
Lagoons of Khasan, Rusia	Native	Northwestern Japan Sea	42.45	130.608	Skriptsova and Choi (2009)
Lagoons of Khasan, Rusia	Native	Northwestern Japan Sea	42.45	130.608	Skriptsova and Choi (2009)
Estuaire du Belon, Brittany, France	Non-native	Northeastern Atlantic Ocean	47.8308	-3.67667	Skriptsova and Choi (2009)
Donghae, South Korea	Native	Northwestern Japan Sea	37.5275	129.133	Skriptsova and Choi (2009)
Donghae, South Korea	Native	Northwestern Japan Sea	37.496	129.163	Skriptsova and Choi (2009)
Sangjokam, Goseong, South Korea	Native	Northwestern Pacific Ocean	34.9037	128.152	Skriptsova and Choi (2009)
Sangjokam, Goseong, South Korea	Native	Northwestern Pacific Ocean	34.9037	128.152	Skriptsova and Choi (2009)
Daejung, Jeju, South Korea	Native	Northwestern Pacific Ocean	33.2275	126.227	Skriptsova and Choi (2009)
Hado, Jeju, South Korea	Native	Northwestern Pacific Ocean	33.5161	126.906	Skriptsova and Choi (2009)
Haengwon, Jeju, South Korea	Native	Northwestern Pacific Ocean	33.5619	126.828	Skriptsova and Choi (2009)
Kimyeong, Jeju, South Korea	Native	Northwestern Pacific Ocean	33.5594	126.759	Skriptsova and Choi (2009)
Kimyeong, Jeju, South Korea	Native	Northwestern Pacific Ocean	33.5594	126.759	Skriptsova and Choi (2009)
Ildoi Dong, Jeju, South Korea	Native	Northwestern Pacific Ocean	33.5223	126.526	Skriptsova and Choi (2009)
Seongsan, Jeju, South Korea	Native	Northwestern Pacific Ocean	33.4582	126.947	Skriptsova and Choi (2009)
Bangpo, Taean, South Korea	Native	Northwestern Pacific Ocean	36.5097	126.326	Skriptsova and Choi (2009)
Inuwaka, Chiba, Japan	Native	Northwestern Pacific Ocean	35.6965	140.847	Skriptsova and Choi (2009)
Shimoda, Shizuoka, Japan	Native	Northwestern Pacific Ocean	34.6592	138.947	Skriptsova and Choi (2009)
Konami, Oki Island, Japan	Native	Northwestern Pacific Ocean	35.6219	133.145	Skriptsova and Choi (2009)
Toms Cove, Delmarva Peninsula, Virginia, USA	Non-native	Northeastern Atlantic Ocean	37.8861	-75.3701	Thomsen et al. (2009)
Chincoteague Channel, Delmarva Peninsula, Virginia, USA	Non-native	Northeastern Atlantic Ocean	37.9159	-75.3999	Thomsen et al. (2009)
north Hog Island, Delmarva Peninsula, Virginia, USA	Non-native	Northeastern Atlantic Ocean	37.4297	-75.708	Thomsen et al. (2009)
south Hog Island, Delmarva Peninsula, Virginia, USA	Non-native	Northeastern Atlantic Ocean	37.3976	-75.722	Thomsen et al. (2009)
Castle Ridge Creek, Delmarva Peninsula, Virginia, USA	Non-native	Northeastern Atlantic Ocean	37.4287	-75.8403	Thomsen et al. (2009)
Elkin Marsh (outside of Oyster Harbor), Delmarva Peninsula, Virginia, USA	Non-native	Northeastern Atlantic Ocean	37.2942	-75.8463	Thomsen et al. (2009)
Oyster Harbor, Delmarva Peninsula, Virginia, USA	Non-native	Northeastern Atlantic Ocean	37.2877	-75.914	Thomsen et al. (2009)
Fishermans Island, Delmarva Peninsula, Virginia, USA	Non-native	Northeastern Atlantic Ocean	37.0939	-75.9647	Thomsen et al. (2009)
Baegryongdo, Incheon, South Korea	Native	Northwestern Pacific Ocean	37.9236	124.651	Kim et al. (2010)
Hackampo, Taean, South Korea	Native	Northwestern Pacific Ocean	36.8983	126.208	Kim et al. (2010)
Myodo, Taean, South Korea	Native	Northwestern Pacific Ocean	36.4742	126.418	Kim et al. (2010)
Ockdo, Taean, South Korea	Native	Northwestern Pacific Ocean	36.9358	126.357	Kim et al. (2010)
Solsum, Taean, South Korea	Native	Northwestern Pacific Ocean	36.6967	126.21	Kim et al. (2010)
Bangpo, Taean, South Korea	Native	Northwestern Pacific Ocean	36.5039	126.334	Kim et al. (2010)
Daecheon, Boryeong, South Korea	Native	Northwestern Pacific Ocean	36.3225	126.504	Kim et al. (2010)
Gyeokpo, Buan, South Korea	Native	Northwestern Pacific Ocean	35.6233	126.468	Kim et al. (2010)
Gyeokpo, Buan, South Korea	Native	Northwestern Pacific Ocean	35.6233	126.468	Kim et al. (2010)
Hoidong, Jindo, South Korea	Native	Northwestern Pacific Ocean	34.4217	126.347	Kim et al. (2010)
Suguchado, Jindo, South Korea	Native	Northwestern Pacific Ocean	34.2556	125.919	Kim et al. (2010)
Dolsando, Yeosu, South Korea	Native	Northwestern Pacific Ocean	34.5994	127.744	Kim et al. (2010)
Yegye, Namhae, South Korea	Native	Northwestern Pacific Ocean	34.8219	127.821	Kim et al. (2010)
Sangjokam, Goseong, South Korea	Native	Northwestern Pacific Ocean	34.9044	128.145	Kim et al. (2010)
Gijang, Busan, South Korea	Native	Northwestern Pacific Ocean	35.2203	129.237	Kim et al. (2010)
Taehwagang, Ulsan, South Korea	Native	Northwestern Pacific Ocean	35.4619	129.354	Kim et al. (2010)
Odo-eeri, Pohang, South Korea	Native	Northwestern Pacific Ocean	36.165	129.399	Kim et al. (2010)
Junchun, Donghae, South Korea	Native	Northwestern Pacific Ocean	37.4903	129.141	Kim et al. (2010)
Junchun, Donghae, South Korea	Native	Northwestern Pacific Ocean	37.4903	129.141	Kim et al. (2010)
Junchun, Donghae, South Korea	Native	Northwestern Pacific Ocean	37.4903	129.141	Kim et al. (2010)
Junchun, Donghae, South Korea	Native	Northwestern Pacific Ocean	37.4903	129.141	Kim et al. (2010)
Daejung, Jeju, South Korea	Native	Northwestern Pacific Ocean	33.2211	126.244	Kim et al. (2010)
Dodoo-ilri, Jeju, South Korea	Native	Northwestern Pacific Ocean	33.4997	126.454	Kim et al. (2010)
Dodoo-samri, Jeju, South Korea	Native	Northwestern Pacific Ocean	33.5111	126.483	Kim et al. (2010)
Ilgwo-eeri, Jeju, South Korea	Native	Northwestern Pacific Ocean	33.2411	126.222	Kim et al. (2010)
Pyosun, Jeju, South Korea	Native	Northwestern Pacific Ocean	33.3261	126.843	Kim et al. (2010)
Sungsan, Jeju, South Korea	Native	Northwestern Pacific Ocean	33.4575	126.939	Kim et al. (2010)
Sungsan, Jeju, South Korea	Native	Northwestern Pacific Ocean	33.4575	126.939	Kim et al. (2010)
Hado, Jeju, South Korea	Native	Northwestern Pacific Ocean	33.5133	126.899	Kim et al. (2010)
Haengwon, Jeju, South Korea	Native	Northwestern Pacific Ocean	33.5572	126.801	Kim et al. (2010)
Haengwon, Jeju, South Korea	Native	Northwestern Pacific Ocean	33.5572	126.801	Kim et al. (2010)
Kimnyung, Jeju, South Korea	Native	Northwestern Pacific Ocean	33.5575	126.758	Kim et al. (2010)
Kimnyung, Jeju, South Korea	Native	Northwestern Pacific Ocean	33.5575	126.758	Kim et al. (2010)
Chujado, Jeju, South Korea	Native	Northwestern Pacific Ocean	33.9606	126.285	Kim et al. (2010)
Oidodong, Jeju, South Korea	Native	Northwestern Pacific Ocean	33.4942	126.427	Kim et al. (2010)
Konami, Oki Island, Japan	Native	Northwestern Pacific Ocean	36	133	Kim et al. (2010)
Nagasaki, Kyushu, Japan	Native	Northwestern Pacific Ocean	32	129	Kim et al. (2010)
Shimoda, Shizuoka, Japan	Native	Northwestern Pacific Ocean	34	138	Kim et al. (2010)
Funabashi, Tokyo Bay, Japan	Native	Northwestern Pacific Ocean	35	140	Kim et al. (2010)
Inuwaka, Chiba, Japan	Native	Northwestern Pacific Ocean	35	139	Kim et al. (2010)
Weihai, Shandong, China	Native	Northwestern Pacific Ocean	37	122	Kim et al. (2010)
Qingdao beach, Shandong, China	Native	Northwestern Pacific Ocean	36.0567	120.346	Kim et al. (2010)
South Primorye, Rusia	Native	Northwestern North Sea	42	131	Kim et al. (2010)
Horsens Fjord, Denmark	Non-native	Eastern North Sea	55.8675	9.93944	Kim et al. (2010)
Locquenolé, Brittany, France	Non-native	Northeastern Atlantic Ocean	48.6342	-3.85917	Kim et al. (2010)
Pont de la Corde, Brittany, France	Non-native	Northeastern Atlantic Ocean	48.6497	-3.96028	Kim et al. (2010)
St.-Pol-de-Léon, Brittany, France	Non-native	Northeastern Atlantic Ocean	48.6889	-3.9675	Kim et al. (2010)
Estuaire du Belon, Brittany, France	Non-native	Northeastern Atlantic Ocean	47.8308	-3.67667	Kim et al. (2010)
Rantum, Sylt, Germany	Non-native	Eastern North Sea	54.8581	8.31861	Kim et al. (2010)
Kiel-Wik, Tirpitzhafen, Germany	Non-native	Eastern North Sea	54.3536	10.1486	Kim et al. (2010)
Schilksee, Strande, Germany	Non-native	Eastern North Sea	54.4361	10.1708	Kim et al. (2010)
Lammholmen, Öckerö, Sweden	Non-native	Northeastern North Sea	57.7064	11.6556	Kim et al. (2010)
Koön, Arvidsvik, Sweden	Non-native	Northeastern North Sea	57.8947	11.5925	Kim et al. (2010)
Askim, Gothenburg, Sweden	Non-native	Northeastern North Sea	57.6325	11.9397	Kim et al. (2010)
Vallda, Kungsbacka, Sweden	Non-native	Northeastern North Sea	57.4836	11.9492	Kim et al. (2010)
Bua harbour, Skällåkra, Sweden	Non-native	Northeastern North Sea	57.2483	12.1253	Kim et al. (2010)
El Yadida, Sidi Moussa, Morocco	Non-native	Northeastern Atlantic Ocean	33.2525	-8.49889	Kim et al. (2010)
Elkhorn Slough, California, USA	Non-native	Northeastern Pacific Ocean	36.8	-121.783	Kim et al. (2010)
Cape Charles, Virginia, USA	Non-native	Northwestern Atlantic Ocean	37.2667	-76.0333	Kim et al. (2010)
Ocracoke Island, North Carolina, USA	Non-native	Northwestern Atlantic Ocean	35.1	-75.9833	Kim et al. (2010)
Bogue Sound, North Carolina, USA	Non-native	Northwestern Atlantic Ocean	34.7283	-76.8372	Kim et al. (2010)
Harker's Island, North Carolina, USA	Non-native	Northwestern Atlantic Ocean	34.7258	-76.5817	Kim et al. (2010)
Pivers Island, North Carolina, USA	Non-native	Northwestern Atlantic Ocean	34.7197	-76.6728	Kim et al. (2010)
Lenoxville Point, North Carolina, USA	Non-native	Northwestern Atlantic Ocean	34.7142	-76.6258	Kim et al. (2010)
McGuiness Point, North Carolina, USA	Non-native	Northwestern Atlantic Ocean	34.7058	-76.8372	Kim et al. (2010)
Shackleford Banks, North Carolina, USA	Non-native	Northwestern Atlantic Ocean	34.6933	-76.6231	Kim et al. (2010)
Morgan Island, North Carolina, USA	Non-native	Northwestern Atlantic Ocean	34.6597	-76.5314	Kim et al. (2010)
Sneads Ferry, North Carolina, USA	Non-native	Northwestern Atlantic Ocean	34.5411	-77.3744	Kim et al. (2010)
Topsail Island Bridge, North Carolina, USA	Non-native	Northwestern Atlantic Ocean	34.4383	-77.5533	Kim et al. (2010)
Rogers Creek, North Carolina, USA	Non-native	Northwestern Atlantic Ocean	34.1697	-77.8486	Kim et al. (2010)
Federal Basin, North Carolina, USA	Non-native	Northwestern Atlantic Ocean	34.2	-77.8333	Kim et al. (2010)
Masonboro Sound, North Carolina, USA	Non-native	Northwestern Atlantic Ocean	34.1447	-77.8722	Kim et al. (2010)
Oak Is, North Carolina, USA	Non-native	Northwestern Atlantic Ocean	33.9244	-78.1047	Kim et al. (2010)
Holden Beach, North Carolina, USA	Non-native	Northwestern Atlantic Ocean	33.9167	-78.3	Kim et al. (2010)
Bonaparte Creek, North Carolina, USA	Non-native	Northwestern Atlantic Ocean	33.8694	-78.5472	Kim et al. (2010)
Pangp'o, Taean, South Korea	Native	Northwestern Pacific Ocean	36.5083	126.331	Myung et al. (2010)
Deaokchon-Ri, South Korea	Native	Northwestern Pacific Ocean	34.0527	127.32	Myung et al. (2010)
Dongdo-Ri, South Korea	Native	Northwestern Pacific Ocean	34.0527	127.32	Myung et al. (2010)
Haengwon, Jeju, South Korea	Native	Northwestern Pacific Ocean	33.5631	126.808	Myung et al. (2010)
Hagwi, Jeju, South Korea	Native	Northwestern Pacific Ocean	33.4862	126.396	Myung et al. (2010)
Iho, Jeju, South Korea	Native	Northwestern Pacific Ocean	33.5067	126.455	Myung et al. (2010)
Jongdal, Jeju, South Korea	Native	Northwestern Pacific Ocean	33.5071	126.917	Myung et al. (2010)
Geumneung, Jeju, South Korea	Native	Northwestern Pacific Ocean	33.3905	126.235	Myung et al. (2010)
Kimnyeong, Jeju, South Korea	Native	Northwestern Pacific Ocean	33.5626	126.748	Myung et al. (2010)
Busan, South Korea	Native	Northwestern Pacific Ocean	35.1307	129.15	Myung et al. (2010)
Pyoseon-myeon, Jeju, South Korea	Native	Northwestern Pacific Ocean	33.3287	126.847	Myung et al. (2010)
Sangjokam, Goseong, South Korea	Native	Northwestern Pacific Ocean	34.9037	128.152	Myung et al. (2010)
Sinyang, Jeju, South Korea	Native	Northwestern Pacific Ocean	33.4236	126.937	Myung et al. (2010)
Sungsan, Jeju, South Korea	Native	Northwestern Pacific Ocean	33.4659	126.947	Myung et al. (2010)
Woljeong, Jeju, South Korea	Native	Northwestern Pacific Ocean	33.5632	126.792	Myung et al. (2010)
Asamushi, Japan	Native	Northwestern Pacific Ocean	40.8943	140.857	Myung et al. (2010)
Inuwaka, Chiba, Japan	Native	Northwestern Pacific Ocean	35.6965	140.847	Myung et al. (2010)
Konami, Oki Island, Japan	Native	Northwestern Pacific Ocean	35.6118	133.117	Myung et al. (2010)
Nokonosima, Fukuoca, Japan	Native	Northwestern Pacific Ocean	33.6247	130.305	Myung et al. (2010)
Shimoda, Shizuoka, Japan	Native	Northwestern Pacific Ocean	34.6563	138.948	Myung et al. (2010)
Fyns Hoved, Denmark	Non-native	Northeastern North Sea	55.615	10.6117	Nejrup and Pedersen (2010)
Holckenhavn Fjord, Denmark	Non-native	Northeastern North Sea	55.2967	10.77	Nejrup and Pedersen (2010)
Marinetta, Po Delta lagoons, Italy	Non-native	Northern Mediterranean Sea	45.0611	12.3536	Sfriso et al. (2010)
Vallona, Po Delta lagoons, Italy	Non-native	Northern Mediterranean Sea	45.045	12.3825	Sfriso et al. (2010)
Barbamarco, Po Delta lagoons, Italy	Non-native	Northern Mediterranean Sea	44.9844	12.4786	Sfriso et al. (2010)
Canarin, Po Delta lagoons, Italy	Non-native	Northern Mediterranean Sea	44.9367	12.4786	Sfriso et al. (2010)
Scardovari, Po Delta lagoons, Italy	Non-native	Northern Mediterranean Sea	44.8383	12.4128	Sfriso et al. (2010)
Ria de Aveiro, Portugal	Non-native	Northeastern Atlantic Ocean	40.666	-8.67923	Sousa et al. (2010)
Ria de Aveiro, Portugal	Non-native	Northeastern Atlantic Ocean	40.634	-8.67569	Villanueva et al. (2010)
Ría de Formosa, Portugal	Non-native	Northeastern Atlantic Ocean	36.9833	-7.91667	Abreu et al. (2011)
Ría de Aveiro, Portugal	Non-native	Northeastern Atlantic Ocean	40.6333	-8.71667	Abreu et al. (2011)
Ría de Aveiro, Portugal	Non-native	Northeastern Atlantic Ocean	40.6341	-8.67585	Abreu et al. (2011)
Ría de Aveiro, Portugal	Non-native	Northeastern Atlantic Ocean	40.6365	-8.66755	Abreu et al. (2011)
Ría de Aveiro, Portugal	Non-native	Northeastern Atlantic Ocean	40.6391	-8.664	Abreu et al. (2011)
Savannah, Georgia	Non-native	Northwestern Atlantic Ocean	31.926	-80.9806	Byers et al. (2012)
Savannah, Georgia	Non-native	Northwestern Atlantic Ocean	31.9513	-80.9829	Byers et al. (2012)
Savannah, Georgia	Non-native	Northwestern Atlantic Ocean	31.9615	-80.9507	Byers et al. (2012)
Savannah, Georgia	Non-native	Northwestern Atlantic Ocean	31.9633	-81.014	Byers et al. (2012)
Hilton Head, South Carolina Coast	Non-native	Northwestern Atlantic Ocean	32.2227	-80.7876	Byers et al. (2012)
Hilton Head, South Carolina Coast	Non-native	Northwestern Atlantic Ocean	32.2232	-80.7694	Byers et al. (2012)
Hilton Head, South Carolina Coast	Non-native	Northwestern Atlantic Ocean	32.2254	-80.7831	Byers et al. (2012)
Hilton Head, South Carolina Coast	Non-native	Northwestern Atlantic Ocean	32.2309	-80.7944	Byers et al. (2012)
Hilton Head, South Carolina Coast	Non-native	Northwestern Atlantic Ocean	32.3376	-80.7885	Byers et al. (2012)
Charleston, South Carolina Coast	Non-native	Northwestern Atlantic Ocean	32.5975	-80.1825	Byers et al. (2012)
Charleston, South Carolina Coast	Non-native	Northwestern Atlantic Ocean	32.7515	-79.903	Byers et al. (2012)
Charleston, South Carolina Coast	Non-native	Northwestern Atlantic Ocean	32.7707	-79.9513	Byers et al. (2012)
Charleston, South Carolina Coast	Non-native	Northwestern Atlantic Ocean	32.7866	-79.8946	Byers et al. (2012)
Ria de Aveiro, Portugal	Non-native	Northeastern Atlantic Ocean	40.605	-8.73556	Cacabelos et al. (2012)
Fyns Hoved, Denmark	Non-native	Northeastern North Sea	55.615	10.6117	Nejrup et al. (2012)
South of the Venice lagoons, Venice, Italy	Non-native	Northeastern North Sea	45.2113	12.2533	Sfriso et al. (2012)
North of the Venice lagoons, Venice, Italy	Non-native	Northern Mediterranean Sea	45.5003	12.545	Sfriso et al. (2012)
Goro, Po Delta lagoons, Italy	Non-native	Northern Mediterranean Sea	44.8143	12.3199	Sfriso et al. (2012)
Scardovari, Po Delta lagoons, Italy	Non-native	Northern Mediterranean Sea	44.8602	12.4174	Sfriso et al. (2012)
Canarin, Po Delta lagoons, Italy	Non-native	Northern Mediterranean Sea	44.9346	12.4981	Sfriso et al. (2012)
Barbamarco, Po Delta lagoons, Italy	Non-native	Northern Mediterranean Sea	44.9917	12.4536	Sfriso et al. (2012)
Vallona, Po Delta lagoons, Italy	Non-native	Northern Mediterranean Sea	45.0155	12.4048	Sfriso et al. (2012)
Marinetta, Po Delta lagoons, Italy	Non-native	Northern Mediterranean Sea	45.0547	12.3695	Sfriso et al. (2012)
Caleri, Po Delta lagoons, Italy	Non-native	Northern Mediterranean Sea	45.0903	12.3216	Sfriso et al. (2012)
Pialassa della Baiona, Ravenna, Italy	Non-native	Northern Mediterranean Sea	44.5026	12.2551	Sfriso et al. (2012)
Teneri, Venice, Italy	Non-native	Northern Mediterranean Sea	45.3961	12.2135	Sfriso et al. (2012)
Estero Banderitas, Baja California Sur, Mexico	Non-native	Northeastern Pacific Ocean	24.8719	-112.152	García-Rodríguez et al. (2013)
Ohuira, Mexico	Non-native	Northeastern Pacific Ocean	25.6669	-108.962	García-Rodríguez et al. (2013)
Navachiste, Mexico	Non-native	Northeastern Pacific Ocean	25.4635	-108.838	García-Rodríguez et al. (2013)
Altata, Mexico	Non-native	Northeastern Pacific Ocean	24.6405	-107.944	García-Rodríguez et al. (2013)
Reforma, Mexico	Non-native	Northeastern Pacific Ocean	25.0765	-108.06	García-Rodríguez et al. (2013)
Ceuta, Mexico	Non-native	Northeastern Pacific Ocean	23.8846	-106.941	García-Rodríguez et al. (2013)
Urias, Mexico	Non-native	Northeastern Pacific Ocean	23.189	-106.364	García-Rodríguez et al. (2013)
Tecapan, Mexico	Non-native	Northeastern Pacific Ocean	22.5385	-105.743	García-Rodríguez et al. (2013)
South California, USA	Non-native	Northeastern Pacific Ocean	33.621	-118.299	Gulbransen (2013)
Virginia, USA	Non-native	Northwestern Atlantic Ocean	37.3635	-75.8018	Gulbransen (2013)
Massachusetts, USA	Non-native	Northwestern Atlantic Ocean	42.3498	-70.9058	Gulbransen (2013)
Rhode Island, USA	Non-native	Northwestern Atlantic Ocean	41.5973	-71.353	Gulbransen (2013)
Oyster, Virginia, USA	Non-native	Northwestern Atlantic Ocean	37.2879	-75.9239	Gulbransen (2013)
Ramshorn, Virginia, USA	Non-native	Northwestern Atlantic Ocean	37.3124	-75.887	Gulbransen (2013)
Mockhorn, Virginia, USA	Non-native	Northwestern Atlantic Ocean	37.2925	-75.8825	Gulbransen (2013)
New, Virginia, USA	Non-native	Northwestern Atlantic Ocean	37.2905	-75.8599	Gulbransen (2013)
Wreck, Virginia, USA	Non-native	Northwestern Atlantic Ocean	37.2713	-75.8013	Gulbransen (2013)
Cobb, Virginia, USA	Non-native	Northwestern Atlantic Ocean	37.3126	-75.7664	Gulbransen (2013)
Vancouver, Canada	Non-native	Northeastern Pacific Ocean	49.2813	-123.536	Gulbransen (2013)
Vancouver, Canada	Non-native	Northeastern Pacific Ocean	48.9081	-125.289	Gulbransen (2013)
Washington, USA	Non-native	Northeastern Pacific Ocean	48.6735	-122.582	Gulbransen (2013)
California, USA	Non-native	Northeastern Pacific Ocean	36.927	-121.959	Gulbransen (2013)
California, USA	Non-native	Northeastern Pacific Ocean	37.6366	-122.306	Gulbransen (2013)
California, USA	Non-native	Northeastern Pacific Ocean	37.4108	-122.492	Gulbransen (2013)
California, USA	Non-native	Northeastern Pacific Ocean	32.6635	-117.189	Gulbransen (2013)
Baja California, Mexico	Non-native	Northeastern Pacific Ocean	32.5311	-117.127	Gulbransen (2013)
Baja California Sur, Mexico	Non-native	Northeastern Pacific Ocean	26.8775	-113.153	Gulbransen (2013)
Baja California Sur, Mexico	Non-native	Northeastern Pacific Ocean	26.7853	-113.465	Gulbransen (2013)
Baja California Sur, Mexico	Non-native	Northeastern Pacific Ocean	26.5152	-112.993	Gulbransen (2013)
Baja California Sur, Mexico	Non-native	Northeastern Pacific Ocean	24.6323	-111.882	Gulbransen (2013)
Baja California Sur, Mexico	Non-native	Northeastern Pacific Ocean	25.1172	-112.25	Gulbransen (2013)
Baja California Sur, Mexico	Non-native	Northeastern Pacific Ocean	24.5094	-111.668	Gulbransen (2013)
Las Piedras, Sinaloa, Mexico	Non-native	Northeastern Pacific Ocean	25.7769	-109.394	Gulbransen (2013)
El Tortugo, Sinaloa, Mexico	Non-native	Northeastern Pacific Ocean	25.3559	-108.765	Gulbransen (2013)
Altamura, Sinaloa, Mexico	Non-native	Northeastern Pacific Ocean	25.031	-108.155	Gulbransen (2013)
San Martín, Sinaloa, Mexico	Non-native	Northeastern Pacific Ocean	22.5842	-105.857	Gulbransen (2013)
Marblehead, Massachusetts, USA	Non-native	Northwestern Atlantic Ocean	42.4674	-70.8247	Gulbransen (2013)
Warwick, Rhode Island, USA	Non-native	Northwestern Atlantic Ocean	41.6936	-71.3459	Gulbransen (2013)
Warwick, Rhode Island, USA	Non-native	Northwestern Atlantic Ocean	41.4685	-71.3734	Gulbransen (2013)
Warwick, Rhode Island, USA	Non-native	Northwestern Atlantic Ocean	41.3892	-71.4591	Gulbransen (2013)
Long Neck, Delaware, USA	Non-native	Northwestern Atlantic Ocean	38.6434	-75.09	Gulbransen (2013)
West Ocean City, Maryland, USA	Non-native	Northwestern Atlantic Ocean	38.2715	-75.1013	Gulbransen (2013)
George Island Landing, Maryland, USA	Non-native	Northwestern Atlantic Ocean	38.0581	-75.2935	Gulbransen (2013)
Chincoteague, Virginia, USA	Non-native	Northwestern Atlantic Ocean	37.8351	-75.4179	Gulbransen (2013)
Greenbush, Virginia, USA	Non-native	Northwestern Atlantic Ocean	37.7905	-75.7911	Gulbransen (2013)
Machipongo, Virginia, USA	Non-native	Northwestern Atlantic Ocean	37.3423	-75.825	Gulbransen (2013)
Virginia Beach, Virginia, USA	Non-native	Northwestern Atlantic Ocean	37.0992	-75.9381	Gulbransen (2013)
Naxera, Virginia, USA	Non-native	Northwestern Atlantic Ocean	37.3513	-76.4356	Gulbransen (2013)
Virginia Beach, Virginia, USA	Non-native	Northwestern Atlantic Ocean	36.7375	-75.8929	Gulbransen (2013)
Newport News, Virginia, USA	Non-native	Northwestern Atlantic Ocean	37.1893	-76.6957	Gulbransen (2013)
Last Chance, North Carolina, USA	Non-native	Northwestern Atlantic Ocean	35.3478	-76.0738	Gulbransen (2013)
Davis, North Carolina, USA	Non-native	Northwestern Atlantic Ocean	34.7739	-76.4243	Gulbransen (2013)
Holden Beach, North Carolina, USA	Non-native	Northwestern Atlantic Ocean	33.8551	-78.3189	Gulbransen (2013)
Topsail Beach, North Carolina, USA	Non-native	Northwestern Atlantic Ocean	34.3511	-77.5761	Gulbransen (2013)
Myrtle Beach, South Carolina, USA	Non-native	Northwestern Atlantic Ocean	33.6359	-78.7742	Gulbransen (2013)
Hilton Head Island, South Carolina, USA	Non-native	Northwestern Atlantic Ocean	32.1674	-80.6432	Gulbransen (2013)
Melbourne Beach, Florida, USA	Non-native	Northwestern Atlantic Ocean	28.0624	-80.5303	Gulbransen (2013)
Missjö, Sweden	Non-native	Northwestern Baltic Sea	58.3359	16.9481	Gulbransen (2013)
Ramsö, Sweden	Non-native	Northeastern North Sea	58.8239	11.1178	Gulbransen (2013)
Olstenshamn, Sweden	Non-native	Northeastern North Sea	58.4064	11.1846	Gulbransen (2013)
Flögen, Sweden	Non-native	Northeastern North Sea	57.9396	11.7357	Gulbransen (2013)
Gothenburg, Sweden	Non-native	Northeastern North Sea	57.6548	11.7691	Gulbransen (2013)
Åsa, Sweden	Non-native	Northeastern North Sea	57.3318	12.0363	Gulbransen (2013)
Träslövsläge, Sweden	Non-native	Northeastern North Sea	57.024	12.2868	Gulbransen (2013)
Nibe, Denmark	Non-native	Northeastern North Sea	57.0512	9.66489	Gulbransen (2013)
Knebel, Denmark	Non-native	Northeastern North Sea	56.1783	10.3162	Gulbransen (2013)
Samsø Municipality, Denmark	Non-native	Eastern North Sea	55.9452	10.6502	Gulbransen (2013)
Alrø Sund, Denmark	Non-native	Eastern North Sea	55.8422	10.0657	Gulbransen (2013)
Saksild Bugt, Denmark	Non-native	Eastern North Sea	55.9826	10.2828	Gulbransen (2013)
Vejle Fjord, Denmark	Non-native	Eastern North Sea	55.6989	9.61576	Gulbransen (2013)
Tranekær, Denmark	Non-native	Southwestern Baltic Sea	55.1127	10.8578	Gulbransen (2013)
Gredstedbro, Denmark	Non-native	Southeastern North Sea	55.4004	8.62058	Gulbransen (2013)
Højer Municipality, Denmark	Non-native	Southeastern North Sea	54.9746	8.55174	Gulbransen (2013)
Nieblum, Germany	Non-native	Southeastern North Sea	54.6706	8.45996	Gulbransen (2013)
Reußenköge, Germany	Non-native	Southeastern North Sea	54.5776	8.85004	Gulbransen (2013)
Fehmarn Island, Germany	Non-native	Southwestern Baltic Sea	54.4311	11.0643	Gulbransen (2013)
Waabs, Germany	Non-native	Southwestern Baltic Sea	54.4977	9.96289	Gulbransen (2013)
Wisch, Germany	Non-native	Southwestern Baltic Sea	54.4511	10.2956	Gulbransen (2013)
English Channel, Locquirec, France	Non-native	Northeastern Atlantic Ocean	48.7349	-3.65622	Gulbransen (2013)
English Channel, Cléder, France	Non-native	Northeastern Atlantic Ocean	48.721	-4.16121	Gulbransen (2013)
Plougastel-Daoulas, France	Non-native	Northeastern Atlantic Ocean	48.3168	-4.37162	Gulbransen (2013)
Cléden-Cap-Sizun, France	Non-native	Northeastern Atlantic Ocean	48.1206	-4.66619	Gulbransen (2013)
Plouhinec, France	Non-native	Northeastern Atlantic Ocean	47.9799	-4.49786	Gulbransen (2013)
Bénodet, France	Non-native	Northeastern Atlantic Ocean	47.853	-4.09808	Gulbransen (2013)
Bay of Biscay, Groix, France	Non-native	Northeastern Atlantic Ocean	47.6691	-3.42477	Gulbransen (2013)
Mindelo, Portugal	Non-native	Northeastern Atlantic Ocean	41.3184	-8.75994	Gulbransen (2013)
Vila Praia de Âncora, Portugal	Non-native	Northeastern Atlantic Ocean	41.8068	-8.8768	Gulbransen (2013)
Belinho, Portugal	Non-native	Northeastern Atlantic Ocean	41.5929	-8.81207	Gulbransen (2013)
Póvoa de Varzim, Portugal	Non-native	Northeastern Atlantic Ocean	41.4007	-8.80077	Gulbransen (2013)
A dos Cunhados e Maceira, Portugal	Non-native	Northeastern Atlantic Ocean	39.1859	-9.38036	Gulbransen (2013)
Alcabideche, Portugal	Non-native	Northeastern Atlantic Ocean	38.7352	-9.48518	Gulbransen (2013)
Alcochete, Portugal	Non-native	Northeastern Atlantic Ocean	38.7641	-8.97341	Gulbransen (2013)
Setúbal Municipality, Portugal	Non-native	Northeastern Atlantic Ocean	38.4799	-8.74527	Gulbransen (2013)
Eden Beach, Sassari, Italy	Non-native	Northwesternern Mediterranean Sea	40.8603	8.58239	Gulbransen (2013)
Comacchio, Ferrara, Italy	Non-native	Northwesternern Mediterranean Sea	44.8127	12.2896	Gulbransen (2013)
Venice Lagoon, Venice, Italy	Non-native	Northwesternern Mediterranean Sea	45.2794	12.2463	Gulbransen (2013)
Shinan District, Qingdao, Shandong, China	Native	Northwestern Yellow Sea	36.0605	120.487	Gulbransen (2013)
Jinghai Wan, China	Native	Northwestern Yellow Sea	36.9089	122.135	Gulbransen (2013)
Ch'angam-dong, North Korea	Native	Northeastern Yellow Sea	38.0673	124.794	Gulbransen (2013)
Ch'am-ch'on, North Korea	Native	Northeastern Yellow Sea	38.2491	124.823	Gulbransen (2013)
Seo-gu, Inchon, South Korea	Native	Northeastern Yellow Sea	37.5419	126.63	Gulbransen (2013)
Jung-gu, Inchon, South Korea	Native	Northeastern Yellow Sea	37.5075	126.37	Gulbransen (2013)
Siheung, Gyeonggi, South Korea	Native	Northeastern Yellow Sea	37.3238	126.673	Gulbransen (2013)
Dangjin, South Chungcheong, South Korea	Native	Northeastern Yellow Sea	37.0359	126.428	Gulbransen (2013)
Taean-gun, South Chungcheong, South Korea	Native	Eastern Yellow Sea	36.4568	126.457	Gulbransen (2013)
Seocheon, South Chungcheong, South Korea	Native	Eastern Yellow Sea	36.0605	126.601	Gulbransen (2013)
Gochang-gun, North Jeolla, South Korea	Native	Southeastern Yellow Sea	35.4623	126.413	Gulbransen (2013)
Condado de Muan, South Jeolla, South Korea	Native	Southeastern Yellow Sea	35.0019	126.312	Gulbransen (2013)
Jindo-gun, South Jeolla, South Korea	Native	Southeastern Yellow Sea	34.6891	126.227	Gulbransen (2013)
Jindo-gun, South Jeolla, South Korea	Native	Eastern Yellow Sea	34.4162	126.384	Gulbransen (2013)
South Korea	Native	Southwestern Japan Sea	34.2866	126.82	Gulbransen (2013)
Goheung-gun, South Jeolla, South Korea	Native	Southwestern Japan Sea	34.7607	127.482	Gulbransen (2013)
Jeju Island, South Korea	Native	Southwestern Japan Sea	33.403	126.959	Gulbransen (2013)
Goseong-gun, South Gyeongsang, South Korea	Native	Southwestern Japan Sea	34.8896	128.25	Gulbransen (2013)
Busan, South Korea	Native	Southwestern Japan Sea	35.2464	129.348	Gulbransen (2013)
Tsushima, Japan	Native	Southwestern Japan Sea	34.603	129.313	Gulbransen (2013)
Donghae, Gangwon, South Korea	Native	Southwestern Japan Sea	37.5068	129.191	Gulbransen (2013)
Uam-ri, Rasŏn, North Korea	Native	Western Japan Sea	42.2531	130.613	Gulbransen (2013)
Zaliv Petra Velikogo, Rusia	Native	Western Japan Sea	42.7645	131.394	Gulbransen (2013)
Bukhta Reyd Pallada, Rusia	Native	Western Japan Sea	42.5945	130.874	Gulbransen (2013)
Nagó, Prefectura de Okinawa, Japan	Native	Northwestern Pacific Ocean	26.6696	128.037	Gulbransen (2013)
Fukue Island, Japan	Native	Northwestern Pacific Ocean	32.6364	128.795	Gulbransen (2013)
Saza, Nagasaki, Japan	Native	Northwestern Pacific Ocean	33.187	129.627	Gulbransen (2013)
Ōmura Bay, Japan	Native	Northwestern Pacific Ocean	33.0215	129.924	Gulbransen (2013)
Ariake Sea, Japan	Native	Northwestern Pacific Ocean	33.1392	130.261	Gulbransen (2013)
Kumamoto, Japan	Native	Northwestern Pacific Ocean	32.7714	130.579	Gulbransen (2013)
Amakusa, Kumamoto, Japan	Native	Northwestern Pacific Ocean	32.3367	129.969	Gulbransen (2013)
Tsunagi, Kumamoto, Japan	Native	Northwestern Pacific Ocean	32.2786	130.433	Gulbransen (2013)
Hagi, Yamaguchi, Japan	Native	Southeastern Japan Sea	34.4888	131.396	Gulbransen (2013)
Kōchi, Japan	Native	Northwestern Pacific Ocean	33.4696	133.51	Gulbransen (2013)
Shikokuchūō, Ehime, Japan	Native	Northwestern Pacific Ocean	34.027	133.441	Gulbransen (2013)
Honshū, Japan	Native	Northwestern Pacific Ocean	34.3966	133.244	Gulbransen (2013)
Dogojima, Japan	Native	Southeastern Japan Sea	36.204	133.331	Gulbransen (2013)
Nishinoshima, Shimane, Japan	Native	Southeastern Japan Sea	36.0753	133.012	Gulbransen (2013)
Yonago, Tottori, Japan	Native	Southeastern Japan Sea	35.4957	133.331	Gulbransen (2013)
Osaka Bay, Japan	Native	Northwestern Pacific Ocean	34.379	135.212	Gulbransen (2013)
Echizen, Fukui, Japan	Native	Southeastern Japan Sea	35.9736	135.947	Gulbransen (2013)
Sado Island, Niigata, Japan	Native	Southeastern Japan Sea	38.1677	138.298	Gulbransen (2013)
Hamamatsu, Shizuoka, Japan	Native	Northwestern Pacific Ocean	34.6536	137.731	Gulbransen (2013)
Suruga Bay, Japan	Native	Northwestern Pacific Ocean	34.7225	138.245	Gulbransen (2013)
Suruga Bay, Japan	Native	Northwestern Pacific Ocean	34.767	138.732	Gulbransen (2013)
Minamiizu, Shizuoka, Japan	Native	Northwestern Pacific Ocean	34.6245	138.906	Gulbransen (2013)
Sagami Island, Japan	Native	Northwestern Pacific Ocean	35.2106	139.176	Gulbransen (2013)
Minamibōsō, Chiba, Japan	Native	Northwestern Pacific Ocean	35.0689	139.826	Gulbransen (2013)
Kōtō, Tokio, Japan	Native	Northwestern Pacific Ocean	35.6225	139.822	Gulbransen (2013)
Sendai Bay, Japan	Native	Northwestern Pacific Ocean	38.1892	141.012	Gulbransen (2013)
Minamisōma, Fukushima, Japan	Native	Northwestern Pacific Ocean	37.6946	141.038	Gulbransen (2013)
Yamada, Iwate, Japan	Native	Northwestern Pacific Ocean	39.5219	142.083	Gulbransen (2013)
Goshogawara, Aomori, Japan	Native	Northeastern Japan Sea	41.0697	140.252	Gulbransen (2013)
Hakodate, Hokkaidō, Japan	Native	Northeastern Japan Sea	41.6536	140.69	Gulbransen (2013)
Tomakomai, Hokkaidō, Japan	Native	Northwestern Pacific Ocean	42.5554	141.662	Gulbransen (2013)
Uchiura Bay, JapónJapan	Native	Northeastern Japan Sea	42.4837	140.592	Gulbransen (2013)
Japan	Native	Northeastern Japan Sea	42.8056	139.912	Gulbransen (2013)
Otaru, Hokkaidō, Japan	Native	Northeastern Japan Sea	43.303	140.835	Gulbransen (2013)
Sarufutsu, Hokkaidō, Japan	Native	Northwestern Pacific Ocean	45.3205	142.294	Gulbransen (2013)
Mombetsu, Hokkaidō, Japan	Native	Northwestern Pacific Ocean	44.3552	143.607	Gulbransen (2013)
Hiroo, Hokkaidō, Japan	Native	Northwestern Pacific Ocean	42.3761	143.412	Gulbransen (2013)
Lake Akkeshi, Hokkaidō, Japan	Native	Northwestern Pacific Ocean	43.0371	144.884	Gulbransen (2013)
Izmeny Strait, Hokkaidō, Japan	Native	Northwestern Pacific Ocean	43.7462	145.122	Gulbransen (2013)
Tanfilev Strait, Japan	Native	Northwestern Pacific Ocean	43.4904	146.098	Gulbransen (2013)
Donghae, South Korea	Native	Southwestern Japan Sea	37.491	129.142	Hammann et al. (2013)
Pohang, North Gyeongsang, South Korea	Native	Southwestern Japan Sea	36.1646	129.4	Hammann et al. (2013)
Jindo, South Korea	Native	Southeastern Yellow Sea	34.4214	126.347	Hammann et al. (2013)
Gochang-gun, North Jeolla, South Korea	Native	Southeastern Yellow Sea	35.6182	126.467	Hammann et al. (2013)
Daecheon, South Korea	Native	Eastern Yellow Sea	36.3231	126.502	Hammann et al. (2013)
Qingdao, South Korea	Native	Western Yellow Sea	36.0551	120.366	Hammann et al. (2013)
Heiligenhafen, Germany	Non-native	Southwestern Baltic Sea	54.38	10.983	Hammann et al. (2013)
Nyborg, Denmark	Non-native	Southwestern Baltic Sea	55.2984	10.8187	Hammann et al. (2013)
Horsens, Denmark	Non-native	Southwestern Baltic Sea	55.8597	9.8766	Hammann et al. (2013)
Nibe, Denmark	Non-native	Northeastern North Sea	56.9843	9.63025	Hammann et al. (2013)
Ribe, Denmark	Non-native	Eastern North Sea	55.3099	8.64298	Hammann et al. (2013)
Nordstrand, Germany	Non-native	Southeastern North Sea	54.53	8.87191	Hammann et al. (2013)
St.-Pol-de-Leon, Brittany, France	Non-native	Northeastern Atlantic Ocean	48.6781	-3.9689	Hammann et al. (2013)
Ensenada, Baja California, Mexico	Non-native	Northeastern Pacific Ocean	31.7746	-116.611	Hammann et al. (2013)
Oyster Creek, Salt Bay, Damariscotta, Maine, USA	Non-native	Northwestern Atlantic Ocean	44.0594	-69.5094	Nettleton et al. (2013)
Salt Bay, Damariscotta, Maine, USA	Non-native	Northwestern Atlantic Ocean	44.0611	-69.8611	Nettleton et al. (2013)
Upper New Meadows River, Bath, Maine, USA	Non-native	Northwestern Atlantic Ocean	43.9281	-69.5281	Nettleton et al. (2013)
Pennellville Landing, Brunswick, Maine, USA	Non-native	Northwestern Atlantic Ocean	43.8608	-69.9608	Nettleton et al. (2013)
Merepoint Boat Launch, Brunswick, Maine, USA	Non-native	Northwestern Atlantic Ocean	43.8331	-70.0164	Nettleton et al. (2013)
Wharton Point, Maquoit Bay, Brunswick, Maine, USA	Non-native	Northwestern Atlantic Ocean	43.8758	-69.9925	Nettleton et al. (2013)
Dover Point, Little Bay, Durham, New Hampshire, USA	Non-native	Northwestern Atlantic Ocean	43.1264	-70.8264	Nettleton et al. (2013)
Sunset Farm, Great Bay, Greenland, New Hampshire, USA	Non-native	Northwestern Atlantic Ocean	43.0508	-70.8342	Nettleton et al. (2013)
Depot Road, Great Bay, Greenland, New Hampshire, USA	Non-native	Northwestern Atlantic Ocean	43.0639	-70.8972	Nettleton et al. (2013)
Lubberland Creek, Great Bay, Newmarket, New Hampshire, USA	Non-native	Northwestern Atlantic Ocean	43.07	-70.9033	Nettleton et al. (2013)
Mattakeeset Town Landing, Duxbury, Massachusetts, USA	Non-native	Northwestern Atlantic Ocean	42.0364	-70.6697	Nettleton et al. (2013)
Bluefish River, Shipyard Center, Duxbury,Massachusetts, USA	Non-native	Northwestern Atlantic Ocean	42.0383	-70.6717	Nettleton et al. (2013)
Ellisville Harbor State Park, Plymouth, Massachusetts, USA	Non-native	Northwestern Atlantic Ocean	41.8353	-70.5353	Nettleton et al. (2013)
Indian Trail Rd., Barnstable, Massachusetts, USA	Non-native	Northwestern Atlantic Ocean	41.7006	-70.2839	Nettleton et al. (2013)
Millway Beach, Barnstable, Massachusetts, USA	Non-native	Northwestern Atlantic Ocean	41.7164	-70.2997	Nettleton et al. (2013)
Provincetown Harbor, Massachusetts, USA	Non-native	Northwestern Atlantic Ocean	42.0358	-70.1858	Nettleton et al. (2013)
Capt. Nathaniel Wixon Dock, W. Harwich, Massachusetts, USA	Non-native	Northwestern Atlantic Ocean	41.6653	-70.1153	Nettleton et al. (2013)
Lewis Pond, Sea Gull Beach, W. Yarmouth, Massachusetts, USA	Non-native	Northwestern Atlantic Ocean	41.6367	-70.2278	Nettleton et al. (2013)
Goddard State Park, Warwick, Rhode Island, USA	Non-native	Northwestern Atlantic Ocean	41.6675	-71.4311	Nettleton et al. (2013)
Budlong Farm, Warwick, Rhode Island, USA	Non-native	Northwestern Atlantic Ocean	41.6861	-71.4233	Nettleton et al. (2013)
Bass Rock, Narragansett, Rhode Island, USA	Non-native	Northwestern Atlantic Ocean	41.405	-71.4575	Nettleton et al. (2013)
Potter Pond, South Kingston, Rhode Island, USA	Non-native	Northwestern Atlantic Ocean	41.3822	-71.5344	Nettleton et al. (2013)
Seaside Beach, Bridgeport, Conneticut, USA	Non-native	Northwestern Atlantic Ocean	41.1528	-73.2108	Nettleton et al. (2013)
Odense Fjord, Denmark	Non-native	Northeastern North Sea	55.5266	10.5313	Thomsen et al. (2013)
Narragansett Bay, Rhode Island, USA	Non-native	Northwestern Atlantic Ocean	41.6223	-71.3505	Guidone et al. (2014)
Oakland Beach, Greenwich Bay, Rhode Island, USA	Non-native	Northwestern Atlantic Ocean	41.6869	-71.4024	Guidone et al. (2014)
Warwick City Park, Rhode Island, USA	Non-native	Northwestern Atlantic Ocean	41.6877	-71.4064	Guidone et al. (2014)
Nokoshima Island, Japan	Non-native	Southern Japan Sea	33.6153	130.313	Muangmai et al. (2014)
Wilmington River, Georgia, USA	Non-native	Northwestern Atlantic Ocean	31.9803	-81.0044	Wright et al. (2014)
Wassaw Sound, Georgia, USA	Non-native	Northwestern Atlantic Ocean	31.9368	-80.9489	Wright et al. (2014)
Donghae, South Korea	Native	Southwestern Japan Sea	37.491	129.142	Hammann et al. (2016)
Odo, South Korea	Native	Southwestern Japan Sea	36.1646	129.4	Hammann et al. (2016)
Gyeokpo, South Korea	Native	Southeastern Yellow Sea	35.6182	126.467	Hammann et al. (2016)
Daechon, South Korea	Native	Eastern Yellow Sea	36.3225	126.504	Hammann et al. (2016)
Rongcheng, South Korea	Native	Northern Yellow Sea	37.1913	122.583	Hammann et al. (2016)
Heiligenhafen, Germany	Non-native	Southwestern Baltic Sea	54.38	10.983	Hammann et al. (2016)
Nyborg, Denmark	Non-native	Southwestern Baltic Sea	55.2984	10.8187	Hammann et al. (2016)
Nibe, Denmark	Non-native	Eastern North Sea	56.9843	9.63025	Hammann et al. (2016)
Nibe, Denmark	Non-native	Eastern North Sea	55.3099	8.64298	Hammann et al. (2016)
Nordstrand, Germany	Non-native	Southeastern North Sea	54.53	8.87191	Hammann et al. (2016)
St.-Pol-de-Leon, Brittany, France	Non-native	Northeastern Atlantic Ocean	48.6781	-3.9689	Hammann et al. (2016)
Ensenada, Baja California, Mexico	Non-native	Northeastern Pacific Ocean	31.7746	-116.611	Hammann et al. (2016)
Yingtang beach, Beihai, China	Native	Northwestern Pacific Ocean	21.45	109.34	Liu et al. (2016)
Jinhaian, Beihai, China	Native	Northwestern Pacific Ocean	21.49	109.11	Liu et al. (2016)
Techeng island, Zhanshan, China	Native	Northwestern Pacific Ocean	21.15	110.44	Liu et al. (2016)
Nanao island, Shantou, China	Native	Northwestern Pacific Ocean	23.45	117.04	Liu et al. (2016)
Zhangpu liuao, Zhanzhou, China	Native	Northwestern Pacific Ocean	23.92	117.77	Liu et al. (2016)
Xingling bay, Xiamen, China	Native	Northwestern Pacific Ocean	24.6	118.08	Liu et al. (2016)
Shengsi island, Zhoushan, China	Native	Northwestern Pacific Ocean	30.68	122.44	Liu et al. (2016)
Quingdao, China	Native	Western Yellow Sea	36.05	120.34	Liu et al. (2016)
Quingdao, China	Native	Western Yellow Sea	36.05	120.34	Liu et al. (2016)
Quingdao, China	Native	Western Yellow Sea	36.05	120.36	Liu et al. (2016)
Yinhai, Quingdao, China	Native	Western Yellow Sea	36.06	120.42	Liu et al. (2016)
Shilaoren sea, Quingdao, China	Native	Western Yellow Sea	36.09	120.49	Liu et al. (2016)
Stone island, Weihai, China	Native	Northwestern Yellow Sea	36.91	122.41	Liu et al. (2016)
Dongchu island, Weihai, China	Native	Northwestern Yellow Sea	37.04	122.56	Liu et al. (2016)
Jiming island, Weihai, China	Native	Northwestern Yellow Sea	37.45	122.48	Liu et al. (2016)
Long island, Yantai, China	Native	Northwestern Yellow Sea	37.94	120.72	Liu et al. (2016)
Huangninchuan, Dalian, China	Native	Northern Yellow Sea	38.82	121.56	Liu et al. (2016)
Heshijao, Dalian, China	Native	Northern Yellow Sea	38.87	121.56	Liu et al. (2016)
Zhangzi island, Dalian, China	Native	Northern Yellow Sea	39.04	122.74	Liu et al. (2016)
Rye, New York, USA	Non-native	Northwestern Atlantic Ocean	40.9627	-73.677	Gorman et al. (2017)
Juncheon, Mukho, South Korea	Native	Southwestern Japan Sea	37.5508	129.115	Gorman et al. (2017)
Carlingford Lough, Co. Louth, Ireland	Non-native	Northeastern Atlantic Ocean	54.0349	-6.16172	Krueger-Hadfield et al. (2017)
River Glaslyn, Porthmadog, Wales, UK	Non-native	Northeastern Atlantic Ocean	52.9239	-4.12033	Krueger-Hadfield et al. (2017)
Batson Creek, Kingsbridge Estuary, Devon, UK	Non-native	Northeastern Atlantic Ocean	50.2429	-3.76903	Krueger-Hadfield et al. (2017)
Brownsea Island Lagoon, Dorset, UK	Non-native	Northeastern Atlantic Ocean	50.6891	-1.97878	Krueger-Hadfield et al. (2017)
Christchurch Harbour, Dorset, UK	Non-native	Northeastern Atlantic Ocean	50.7181	-1.7603	Krueger-Hadfield et al. (2017)
Dundrum Bay, Downpatrick, UK	Non-native	Northeastern Atlantic Ocean	54.2619	-5.82291	Krueger-Hadfield et al. (2017)
Moulin, Bay of Brest, Brittany, France	Non-native	Northeastern Atlantic Ocean	48.3582	-4.34078	Surget et al. (2017)
Penfoul, Bay of Brest, Brittany, France	Non-native	Northeastern Atlantic Ocean	48.3603	-4.31977	Surget et al. (2017)
Faou, Bay of Brest, Brittany, France	Non-native	Northeastern Atlantic Ocean	48.3583	-4.34073	Surget et al. (2017)
Rongcheng, China	Native	Northern Yellow Sea	37.1512	122.56	Wang et al. (2017)
Qingdao, China	Native	Northern Yellow Sea	36.0502	120.35	Wang et al. (2017)
Akkeshi, Japan	Native	Northwestern Pacific Ocean	43.0238	144.88	Wang et al. (2017)
Tokyo, Japan	Native	Northwestern Pacific Ocean	35.3238	139.636	Wang et al. (2017)
Kiel, Germany	Non-native	Southwestern Baltic Sea	54.3992	10.2148	Wang et al. (2017)
Nordstrand, Germany	Non-native	Southeastern North Sea	54.4861	8.81244	Wang et al. (2017)
Belon, France	Non-native	Northeastern Atlantic Ocean	47.8266	-3.67236	Wang et al. (2017)
Pouldouran, France	Non-native	Northeastern Atlantic Ocean	48.7655	-3.20039	Wang et al. (2017)
Shimabira, Japan	Native	Northwestern Pacific Ocean	31.7068	130.272	Bippus et al. (2018)
Kaeda, Japan	Native	Northwestern Pacific Ocean	31.8172	131.448	Bippus et al. (2018)
Hakata Bay, Wajiro, Japan	Native	Southern Japan Sea	33.6736	130.427	Bippus et al. (2018)
Shikanoshima, Japan	Native	Southern Japan Sea	33.6631	130.296	Bippus et al. (2018)
Hikiyama, Japan	Native	Northwestern Pacific Ocean	31.7321	130.672	Bippus et al. (2018)
Hayase River, Japan	Native	Southeastern Japan Sea	35.6153	135.906	Bippus et al. (2018)
Moune Bay, Japan	Native	Northwestern Pacific Ocean	38.9012	141.623	Bippus et al. (2018)
Mangoku-ura, Japan	Native	Northwestern Pacific Ocean	38.4182	141.413	Bippus et al. (2018)
Soukanzan, Japan	Native	Northwestern Pacific Ocean	38.3528	141.06	Bippus et al. (2018)
Shinoricho, Hakodate, Japan	Native	Northwestern Pacific Ocean	41.7649	140.818	Bippus et al. (2018)
Lake Akkeshi, Akkeshi, Japan	Native	Northwestern Pacific Ocean	43.0251	144.88	Bippus et al. (2018)
Futatsuiwa, Abashiri, Japan	Native	Northwestern Pacific Ocean	44.0493	144.258	Bippus et al. (2018)
Uchiura Bay, Japan	Native	Northwestern Pacific Ocean	42.5155	140.786	Bippus et al. (2018)
Inubosaki, Chōshi, Japan	Native	Northwestern Pacific Ocean	35.701	140.863	Bippus et al. (2018)
Heiligenhafen, Germany	Non-native	Southwestern Baltic Sea	54.3802	10.9832	Bippus et al. (2018)
Heikendorf Kiel, Germany	Non-native	Southwestern Baltic Sea	54.3638	10.1937	Bippus et al. (2018)
Nordstrand, Germany	Non-native	Southeastern North Sea	54.4863	8.81274	Bippus et al. (2018)
Saint-Pol-de-Léon, France	Non-native	Northeastern Atlantic Ocean	48.6758	-3.97161	Bippus et al. (2018)
Rance, France	Non-native	Northeastern Atlantic Ocean	48.5146	-1.9698	Bippus et al. (2018)
Le Faou, France	Non-native	Northeastern Atlantic Ocean	48.296	-4.1821	Bippus et al. (2018)
Pont-l'Abbé, France	Non-native	Northeastern Atlantic Ocean	47.8669	-4.21587	Bippus et al. (2018)
A Coruña, Galicia, Spain	Non-native	Northeastern Atlantic Ocean	43.3283	-8.37892	Bippus et al. (2018)
Aveiro, Portugal	Non-native	Northeastern Atlantic Ocean	40.6378	-8.66586	Bippus et al. (2018)
Faro, Portugal	Non-native	Northeastern Atlantic Ocean	37.0278	-8.02243	Bippus et al. (2018)
James Island, Charleston, South Carolina, USA	Non-native	Northwestern Atlantic Ocean	32.7511	-79.9012	Bippus et al. (2018)
Savannah, Georgia, USA	Non-native	Northwestern Atlantic Ocean	31.9508	-80.9844	Bippus et al. (2018)
Elliot's Beach, South Carolina, USA	Non-native	Northwestern Atlantic Ocean	32.3176	-80.7038	Bippus et al. (2018)
Great Bay, New Hampshire, USA	Non-native	Northwestern Atlantic Ocean	43.0921	-70.8647	Bippus et al. (2018)
Sandy Point, Rhode Island, USA	Non-native	Northwestern Atlantic Ocean	41.6618	-71.4099	Bippus et al. (2018)
Lighthouse Point, Long Island Sound, Connecticut, USA	Non-native	Northwestern Atlantic Ocean	41.2488	-72.9042	Bippus et al. (2018)
Crab Meadow, New York, USA	Non-native	Northwestern Atlantic Ocean	40.9286	-73.3268	Bippus et al. (2018)
Upper Haul Over Wachapreague, Virginia, USA	Non-native	Northwestern Atlantic Ocean	37.6195	-75.6696	Bippus et al. (2018)
Castle Ridge Creek Willis Wharf, Virginia, USA	Non-native	Northwestern Atlantic Ocean	37.4559	-75.8186	Bippus et al. (2018)
Case Inlet, Washington, USA	Non-native	Northeastern Pacific Ocean	47.2105	-122.842	Bippus et al. (2018)
Eld Inlet, Washington, USA	Non-native	Northeastern Pacific Ocean	47.0849	-122.979	Bippus et al. (2018)
Port Moody, British Columbus, Canada	Non-native	Northeastern Pacific Ocean	49.28	-122.852	Bippus et al. (2018)
Tomales Bay, California, USA	Non-native	Northeastern Pacific Ocean	38.1796	-122.909	Bippus et al. (2018)
Bodega Bay, California, USA	Non-native	Northeastern Pacific Ocean	38.3178	-123.055	Bippus et al. (2018)
Wassaw Sound, Georgia, USA	Non-native	Northwestern Atlantic Ocean	31.9386	-80.9483	Haram et al. (2018)
Naukati Bay, Alaska, USA	Non-native	Northwestern Pacific Ocean	55.8059	-133.171	Krueger-Hadfield et al. (2018)
Alaska, USA	Non-native	Northwestern Pacific Ocean	55.7336	-133.29	Krueger-Hadfield et al. (2018)
St. Philip Island, Alaska, USA	Non-native	Northwestern Pacific Ocean	55.6348	-133.404	Krueger-Hadfield et al. (2018)
Klawock Marina, Alaska, USA	Non-native	Northwestern Pacific Ocean	55.5538	-133.101	Krueger-Hadfield et al. (2018)
Craig, Alaska, USA	Non-native	Northwestern Pacific Ocean	55.4706	-133.139	Krueger-Hadfield et al. (2018)
Shelikov Island, Alaska, USA	Non-native	Northwestern Pacific Ocean	55.2637	-132.995	Krueger-Hadfield et al. (2018)
Dall Island, Alaska, USA	Non-native	Northwestern Pacific Ocean	55.1881	-133.104	Krueger-Hadfield et al. (2018)
St. Philip Island, Alaska, USA	Non-native	Northwestern Pacific Ocean	55.0855	-132.824	Krueger-Hadfield et al. (2018)
Grayland, Washington, USA	Non-native	Northwestern Pacific Ocean	46.862	-124.072	Krueger-Hadfield et al. (2018)
Willapa Bay, Washington, USA	Non-native	Northwestern Pacific Ocean	46.6066	-123.955	Krueger-Hadfield et al. (2018)
Willapa Bay, Washington, USA	Non-native	Northwestern Pacific Ocean	46.4029	-123.952	Krueger-Hadfield et al. (2018)
Hobsonville, Oregon, USA	Non-native	Northwestern Pacific Ocean	45.5482	-123.906	Krueger-Hadfield et al. (2018)
Netarts Bay, Oregon, USA	Non-native	Northwestern Pacific Ocean	45.415	-123.935	Krueger-Hadfield et al. (2018)
Yaquina View Rd	Non-native	Northwestern Pacific Ocean	44.611	-124.011	Krueger-Hadfield et al. (2018)
Oysterville, Oregon, USA	Non-native	Northwestern Pacific Ocean	44.5751	-123.979	Krueger-Hadfield et al. (2018)
Bayview, Oregon, USA	Non-native	Northwestern Pacific Ocean	44.4422	-124.04	Krueger-Hadfield et al. (2018)
Eureka, California, USA	Non-native	Northwestern Pacific Ocean	40.8328	-124.172	Krueger-Hadfield et al. (2018)
Tompkins Hill Road	Non-native	Northwestern Pacific Ocean	40.7071	-124.211	Krueger-Hadfield et al. (2018)
Redwood Highway cove	Non-native	Northwestern Pacific Ocean	40.6993	-12.2054	Krueger-Hadfield et al. (2018)
Blake's Landing	Non-native	Northwestern Pacific Ocean	38.1796	-122.909	Krueger-Hadfield et al. (2018)
San Francisco Bay, California, USA	Non-native	Northwestern Pacific Ocean	37.9436	-122.412	Krueger-Hadfield et al. (2018)
Bolinas, California, USA	Non-native	Northwestern Pacific Ocean	37.9303	-122.696	Krueger-Hadfield et al. (2018)
Stinson Beach, California, USA	Non-native	Northwestern Pacific Ocean	37.9201	-122.672	Krueger-Hadfield et al. (2018)
Strawberry, California, USA	Non-native	Northwestern Pacific Ocean	37.8837	-122.508	Krueger-Hadfield et al. (2018)
Prunedale, California, USA	Non-native	Northwestern Pacific Ocean	36.846	-121.754	Krueger-Hadfield et al. (2018)
Prunedale, California, USA	Non-native	Northwestern Pacific Ocean	36.8406	-121.744	Krueger-Hadfield et al. (2018)
Morro Bay, California, USA	Non-native	Northwestern Pacific Ocean	35.3444	-120.84	Krueger-Hadfield et al. (2018)
Baywood-Los Osos, California, USA	Non-native	Northwestern Pacific Ocean	35.3269	-120.842	Krueger-Hadfield et al. (2018)
Long Beach, California, USA	Non-native	Northwestern Pacific Ocean	33.7646	-118.127	Krueger-Hadfield et al. (2018)
Huntington Beach, California, USA	Non-native	Northwestern Pacific Ocean	33.6955	-118.046	Krueger-Hadfield et al. (2018)
Newport Beach, California, USA	Non-native	Northwestern Pacific Ocean	33.6241	-117.886	Krueger-Hadfield et al. (2018)
Carlsbad, California, USA	Non-native	Northwestern Pacific Ocean	33.1419	-117.32	Krueger-Hadfield et al. (2018)
San Diego, California, USA	Non-native	Northwestern Pacific Ocean	32.7968	-117.211	Krueger-Hadfield et al. (2018)
Crown Point, San Diego, California, USA	Non-native	Northwestern Pacific Ocean	32.7949	-117.23	Krueger-Hadfield et al. (2018)
San Diego, California, USA	Non-native	Northwestern Pacific Ocean	32.7723	-117.22	Krueger-Hadfield et al. (2018)
San Diego Bay, California, USA	Non-native	Northwestern Pacific Ocean	32.6286	-117.108	Krueger-Hadfield et al. (2018)
Oostvoornse, The Netherlands	Non-native	Southern North Sea	51.9132	4.03738	van Ginneken (2018)
Barnstable, Massachusetts, USA	Non-native	Northwestern Atlantic Ocean	41.7151	-70.3033	Keller et al. (2019)
Cabo Cod Bay, Eastham, Massachusetts, USA	Non-native	Northwestern Atlantic Ocean	41.8301	-70.0048	Keller et al. (2019)
South Yarmouth, Yarmouth, Massachusetts, USA	Non-native	Northwestern Atlantic Ocean	41.6458	-70.1949	Keller et al. (2019)
Toms Cove, Chincoteague, Virginia, USA	Non-native	Northwestern Atlantic Ocean	37.8824	-75.3709	Keller et al. (2019)
Worm Flat (Burton’s Bay), Virginia, USA	Non-native	Northwestern Atlantic Ocean	37.6198	-75.6699	Keller et al. (2019)
EastWye (Cedar Island), Virginia, USA	Non-native	Northwestern Atlantic Ocean	37.5977	-75.6219	Keller et al. (2019)
Poley Point, Gloucester Point, Virginia, USA	Non-native	Northwestern Atlantic Ocean	37.2742	-76.585	Keller et al. (2019)
Sandy Point, Gloucester Point, Virginia, USA	Non-native	Northwestern Atlantic Ocean	37.2676	-76.5535	Keller et al. (2019)
Wythe, Hampton, Virginia, USA	Non-native	Northwestern Atlantic Ocean	36.9998	-76.374	Keller et al. (2019)
Stuart Gardens, Virginia, USA	Non-native	Northwestern Atlantic Ocean	36.9746	-76.4022	Keller et al. (2019)
Clonakilty estuary, Ireland	Non-native	Northeastern Atlantic Ocean	51.6194	-8.88024	Bermejo et al. (2020)
Clonakilty estuary, Ireland	Non-native	Northeastern Atlantic Ocean	51.6119	-8.84979	Bermejo et al. (2020)
Peirce Island, Portsmouth, New Hampshire, USA	Non-native	Northwestern Atlantic Ocean	43.0754	-70.747	Burdick et al. (2020)
Hilton Park, Dover, New Hampshire, USA	Non-native	Northwestern Atlantic Ocean	43.1229	-70.8279	Burdick et al. (2020)
Cedar Point, Durham, New Hampshire, USA	Non-native	Northwestern Atlantic Ocean	43.1293	-70.8528	Burdick et al. (2020)
Wagon Hill Farm, Durham, New Hampshire, USA	Non-native	Northwestern Atlantic Ocean	43.1246	-70.8726	Burdick et al. (2020)
Adams Point, Durham, New Hampshire, USA	Non-native	Northwestern Atlantic Ocean	43.0902	-70.8674	Burdick et al. (2020)
Lubberland Creek, Newmarket, New Hampshire	Non-native	Northwestern Atlantic Ocean	43.0743	-70.9034	Burdick et al. (2020)
Depot Road, Greenland, Newmarket, New Hampshire	Non-native	Northwestern Atlantic Ocean	43.0561	-70.8968	Burdick et al. (2020)
Sunset Hill Farm, Newington, Newmarket, New Hampshire	Non-native	Northwestern Atlantic Ocean	43.0575	-70.8344	Burdick et al. (2020)
Yeongheung-myeon, Ongjin-gun, Incheon, Korea	Non-native	Eastern Yellow Sea	37.2528	126.481	Samanta et al. (2020)
Clonakilty estuary, Ireland	Non-native	Northeastern Atlantic Ocean	51.6179	-8.87662	Schrofner (2020)
Clonakilty estuary, Ireland	Non-native	Northeastern Atlantic Ocean	51.6087	-8.85127	Schrofner (2020)
Venice Lagoon, Italy	Non-native	Northwestern Mediterranean Sea	45.3282	12.2443	Sfriso et al. (2020a)
Porto Marghera, Italy	Non-native	Northwestern Mediterranean Sea	45.4492	12.276	Sfriso et al. (2020a)
Valle Millecampi, Italy	Non-native	Northwestern Mediterranean Sea	45.2769	12.1766	Sfriso et al. (2020a)
Venice Lagoon, Italy	Non-native	Northwestern Mediterranean Sea	45.4065	12.3027	Sfriso et al. (2020b)
Po delta lagoons, Italy	Non-native	Northwestern Mediterranean Sea	45.0056	12.3293	Sfriso et al. (2020b)
Pialassa della Baiona, Ravenna, Italy	Non-native	Northwestern Mediterranean Sea	44.5067	12.2497	Sfriso et al. (2020b)
Lagoa de Óbidos, Portugal	Non-native	Northeastern Atlantic Ocean	39.4053	-9.18696	Afonso et al. (2021)
Figueira da Foz, Portugal	Non-native	Northeastern Atlantic Ocean	40.1324	-8.84331	Afonso et al. (2021)
Shinori, Hakodate City, Hokkaido	Native	Northwestern Pacific Ocean	41.7667	140.817	Kameyama et al. (2021)
Terushima, Ichiki-Kushikino City, Kagoshima	Native	Northwestern Pacific Ocean	31.7	130.267	Kameyama et al. (2021)
Sakaenakamachi, Makurazaki, Kagoshima Prefecture, Japan	Native	Northwestern Pacific Ocean	31.2768	130.308	Krueger-Hadfield et al. (2021)
Origuchi, Akune, Kagoshima Prefecture, Japan	Native	Northwestern Pacific Ocean	32.0603	130.208	Krueger-Hadfield et al. (2021)
Kyūshū, Japan	Native	Northwestern Pacific Ocean	31.7321	130.672	Krueger-Hadfield et al. (2021)
Ashikita, Kumamoto Prefecture, Japan	Native	Northwestern Pacific Ocean	32.3538	130.508	Krueger-Hadfield et al. (2021)
Hakata Bay, Fukuoka, Japan	Native	Southwestern Japan Sea	33.6631	130.296	Krueger-Hadfield et al. (2021)
Hakata Bay, Fukuoka, Japan	Native	Southwestern Japan Sea	33.6731	130.327	Krueger-Hadfield et al. (2021)
Miyajimacho, Hatsukaichi, Hiroshima, Japan	Native	Northwestern Pacific Ocean	33.178	132.19	Krueger-Hadfield et al. (2021)
Seiyo, Ehime Prefecture, Japan	Native	Northwestern Pacific Ocean	33.3336	132.327	Krueger-Hadfield et al. (2021)
Ikuno Island, Shimanto, Kōchi Prefecture, Japan	Native	Northwestern Pacific Ocean	33.2904	132.924	Krueger-Hadfield et al. (2021)
Fukahori, Isumi, Chiba, Japan	Native	Northwestern Pacific Ocean	35.2849	140.408	Krueger-Hadfield et al. (2021)
Shinmaiko, Chita, Aichi Prefecture, Japan	Native	Northwestern Pacific Ocean	34.9551	136.826	Krueger-Hadfield et al. (2021)
Yura, Hidaka District, Wakayama Prefecture, Japan	Native	Northwestern Pacific Ocean	33.9855	135.078	Krueger-Hadfield et al. (2021)
Tsui, Inami, Hidaka District, Wakayama Prefecture, Japan	Native	Northwestern Pacific Ocean	33.8123	135.203	Krueger-Hadfield et al. (2021)
Tenjin Island, Sajima, Yokosuka, Kanagawa Prefecture, Japan	Native	Northwestern Pacific Ocean	35.1335	139.362	Krueger-Hadfield et al. (2021)
Otawa Bay, Yokosuka, Kanagawa Prefecture, Japan	Native	Northwestern Pacific Ocean	35.2219	139.607	Krueger-Hadfield et al. (2021)
Matsushima, Miyagi Prefecture, Japan	Native	Northwestern Pacific Ocean	38.3519	141.061	Krueger-Hadfield et al. (2021)
Nagasakimachi, Chōshi, Chiba Prefecture, Japan	Native	Northwestern Pacific Ocean	35.6943	140.865	Krueger-Hadfield et al. (2021)
Hayase, Mihama, Fukui Prefecture, Japan	Native	Southeastern Japan Sea	35.6163	135.908	Krueger-Hadfield et al. (2021)
Ku Okuharamachi, Ishikawa Prefecture, Japan	Native	Southeastern Japan Sea	37.0778	136.906	Krueger-Hadfield et al. (2021)
Noukodomari, Itoigawa, Niigata Prefecture, Japan	Native	Eastern Japan Sea	37.1094	138	Krueger-Hadfield et al. (2021)
Honshū, Japan	Native	Northwestern Pacific Ocean	38.3508	141.054	Krueger-Hadfield et al. (2021)
Mangoku-ura, Onagawa, Miyagi Prefecture, Japan	Native	Northwestern Pacific Ocean	38.4182	141.413	Krueger-Hadfield et al. (2021)
Kaminoyama Momonoura, Ishinomaki, Miyagi Prefecture, Japan	Native	Northwestern Pacific Ocean	38.3993	141.43	Krueger-Hadfield et al. (2021)
Noshiro, Akita Prefecture, Japan	Native	Northeastern Japan Sea	40.2099	140	Krueger-Hadfield et al. (2021)
Moune Bay, Kesennuma, Miyagi Prefecture, Japan	Native	Northwestern Pacific Ocean	38.9012	141.623	Krueger-Hadfield et al. (2021)
Yamada, Iwate Prefecture, Japan	Native	Northwestern Pacific Ocean	39.5874	141.959	Krueger-Hadfield et al. (2021)
Kagoshima Bay, Japan	Native	Northwestern Pacific Ocean	31.7015	130.757	Krueger-Hadfield et al. (2021)
Uchiura Bay, Hokkaidō, Japan	Native	Northwestern Pacific Ocean	42.5155	140.786	Krueger-Hadfield et al. (2021)
Lake Saroma, Hokkaidō, Japan	Native	Northwestern Pacific Ocean	44.1295	143.776	Krueger-Hadfield et al. (2021)
Sado Island, Niigata, Japan	Native	Eastern Japan Sea	33.0393	133.258	Krueger-Hadfield et al. (2021)
Cesantes' Beach, Galicia, Spain	Non-native	Northeastern Atlantic Ocean	42.3096	-8.62582	Personal observations in 2021

## Sheet: References
Abreu MH, Pereira R, Sousa-Pinto I, Yarish C (2011) Ecophysiological studies of the non-indigenous species Gracilaria vermiculophylla (Rhodophyta) and its abundance patterns in Ria de Aveiro lagoon, Portugal. Eur J Phycol 46:453-464. https://doi.org/10.1080/09670262.2011.633174
Afonso C, Correia AP, Freitas M V., et al (2021) Seasonal Changes in the Nutritional Composition of Agarophyton vermiculophyllum (Rhodophyta, Gracilariales) from the Center of Portugal. Foods 10:1145. https://doi.org/10.3390/FOODS10051145
Bellorin AM, Oliveira MC, Oliveira EC (2004) Gracilaria vermiculophylla: A western Pacific species of Gracilariaceae (Rhodophyta) first recorded from the eastern Pacific. Phycol Res 52:69-79. https://doi.org/10.1111/J.1440-183.2004.00330.X
Bermejo R, MacMonagail M, Heesch S, et al (2020) The arrival of a red invasive seaweed to a nutrient over-enriched estuary increases the spatial extent of macroalgal blooms. Mar Environ Res 158:104944. https://doi.org/10.1016/J.MARENVRES.2020.104944
Bippus PM, Krueger-Hadfield SA, Sotka EE (2018) Palatability of an introduced seaweed does not differ between native and non-native populations. Mar Biol 165:39. https://doi.org/10.1007/s00227-018-3291-5
Burdick DM, Moore G, Mathieson AC, et al (2020) Seaweed Monitoring in the Great Bay Estuary: 2019 Annual Report. PREP Reports Publ 442:
Byers JE, Gribben PE, Yeager C, Sotka EE (2012) Impacts of an abundant introduced ecosystem engineer within mudflats of the southeastern US coast. Biol Invasions 14:2587-2600. https://doi.org/10.1007/S10530-012-0254-5/FIGURES/8
Cacabelos E, Engelen AH, Mejia A, Arenas F (2012) Comparison of the assemblage functioning of estuary systems dominated by the seagrass Nanozostera noltii versus the invasive drift seaweed Gracilaria vermiculophylla. J Sea Res 72:99-105. https://doi.org/10.1016/J.SEARES.2012.02.003
Freshwater DW, Montgomery F, Greene JK, et al (2006) Distribution and identification of an invasive Gracilaria species that is hampering commercial fishing operations in southeastern North Carolina, USA. Biol Invasions 8:631-637. https://doi.org/10.1007/s10530-005-1809-5
García-Rodríguez LD, Riosmena-Rodríguez R, Kim SY, et al (2013) Recent introduction of Gracilaria parvispora (Gracilariales, Rhodophyta) in Baja California, Mexico. Bot Mar 56:143-150. https://doi.org/10.1515/BOT-2012-0177/MACHINEREADABLECITATION/RIS
Gorman L, Kraemer GP, Yarish C, et al (2017) The effects of temperature on the growth rate and nitrogen content of invasive Gracilaria vermiculophylla and native Gracilaria tikvahiae from Long Island Sound, USA. Algae 32:57-66. https://doi.org/10.4490/ALGAE.2017.32.1.30
Guidone M, Newton C, Thornber CS (2014) Utilization of the invasive alga Gracilaria vermiculophylla (Ohmi) Papenfuss by the native mud snail Ilyanassa obsoleta (Say). J Exp Mar Bio Ecol 452:119-124. https://doi.org/10.1016/J.JEMBE.2013.12.016
Guillemin ML, Akki SA, Givernaud T, et al (2008) Molecular characterisation and development of rapid molecular methods to identify species of Gracilariaceae from the Atlantic coast of Morocco. Aquat Bot 89:324-330. https://doi.org/10.1016/j.aquabot.2008.03.008
Gulbransen DJ (2013) Gracilaria vermiculophylla in the Virginia coastal bays: Documenting the distribution and effects of a non-native species
Hammann M, Rempt M, Pohnert G, et al (2016) Increased potential for wound activated production of Prostaglandin E2 and related toxic compounds in non-native populations of Gracilaria vermiculophylla. Harmful Algae 51:81-88. https://doi.org/10.1016/j.hal.2015.11.009
Hammann M, Wang G, Rickert E, et al (2013) Invasion success of the seaweed Gracilaria vermiculophylla correlates with low palatibility. Mar Ecol Prog Ser 486:93-103. https://doi.org/10.3354/MEPS10361
Haram LE, Kinney KA, Sotka EE, Byers JE (2018) Mixed effects of an introduced ecosystem engineer on the foraging behavior and habitat selection of predators. Ecology 99:2751-2762. https://doi.org/10.1002/ECY.2495
Kameyama R, Nishihara GN, Kawagoe C, Terada R (2021) The effects of four stressors, irradiance, temperature, desiccation, and salinity on the photosynthesis of a red alga, Agarophyton vermiculophyllum (Gracilariales) from a native distributional range in Japan. J Appl Phycol 33:2561-2575. https://doi.org/10.1007/S10811-021-02469-1/FIGURES/6
Keller EL, Berke SK, Needham CN, Salerno CR (2019) A Double-Edged Sword: Infaunal Responses to Agarophyton vermiculophyllum in the Mid-Atlantic United States. Estuaries and Coasts 42:1924-1937. https://doi.org/10.1007/S12237-019-00608-Z/FIGURES/7
Kim SY, Weinberger F, Boo SM (2010) Genetic data hint at a common donor region for invasive Atlantic and Pacific populations of Gracillaria vermiculophylla (Gracilariales, Rhodophyta)1. J Phycol 46:1346-1349. https://doi.org/10.1111/J.1529-8817.2010.00905.X
Krueger-Hadfield SA, Byers JE, Bonthond G, et al (2021) Intraspecific diversity and genetic structure in the widespread macroalga Agarophyton vermiculophyllum. J Phycol 57:1403-1410. https://doi.org/10.1111/JPY.13195
Krueger-Hadfield SA, Kollars NM, Strand AE, et al (2017) Genetic identification of source and likely vector of a widespread marine invader. Ecol Evol 7:4432-4447. https://doi.org/10.1002/ECE3.3001
Krueger-Hadfield SA, Stephens TA, Ryan WH, Heiser S (2018) Everywhere you look, everywhere you go, there's an estuary invaded by the red seaweed Gracilaria vermiculophylla (Ohmi) Papenfuss, 1967. BioInvasions Rec 7:343-355
Liu S, Jiang Z, Zhang J, et al (2016) Effect of nutrient enrichment on the source and composition of sediment organic carbon in tropical seagrass beds in the South China Sea. Mar Pollut Bull 110:274-280. https://doi.org/10.1016/J.MARPOLBUL.2016.06.054
Muangmai N, Vo TD, Kawaguchi S (2014) Seasonal fluctuation in a marine red alga, Gracilaria vermiculophylla (Gracilariales, Rhodophyta), from Nokonoshima Island, Southern Japan. J Fac Agric Kyushu Univ 59:243-248. https://doi.org/10.5109/1467624
Myung K, Mi Yeon Y, Ga Youn C (2010) Applying DNA barcoding to Korean Gracilariaceae (Rhodophyta). Cryptogam Algol 31:387-401
Nehls G (2006) Gracilaria vermiculophylla (Gracilariales, Rhodophyta)-a Pacific algae spreading on tidal flats of the Wadden Sea
Nejrup LB, Pedersen MF (2010) Growth and biomass development of the introduced red alga Gracilaria vermiculophylla is unaffected by nutrient limitation and grazing. Aquat Biol 10:249-259. https://doi.org/10.3354/AB00281
Nejrup LB, Pedersen MF, Vinzent J (2012) Grazer avoidance may explain the invasiveness of the red alga Gracilaria vermiculophylla in Scandinavian waters. Mar Biol 159:1703-1712. https://doi.org/10.1007/S00227-012-1959-9/TABLES/1
Nettleton JC, Mathieson AC, Thornber C, et al (2013) Introduction of Gracilaria vermiculophylla (Rhodophyta, Gracilariales) to New England, USA: Estimated Arrival Times and Current Distribution. Rhodora 115:28-41. https://doi.org/10.3119/12-07
Nyberg CD (2006) Attributes of non-indigenous seaweeds with special emphasis on Gracilaria vermiculophylla. Licenciate thesis, Göteborg University
Nyberg CD (2007) Introduced marine macroalgae and habitat modifiers. Licenciate thesis, Göteborg University
Nyberg CD, Thomsen MS, Wallentinus I (2009) Flora and fauna associated with the introduced red alga Gracilaria vermiculophylla. Eur J Phycol 44:395-403. https://doi.org/10.1080/09670260802592808
Nyberg CD, Wallentinus I (2009) Long-term survival of an introduced red alga in adverse conditions. Mar Biol Res 5:304-308. https://doi.org/10.1080/17451000802428159
Ohmi H (1956) Contributions to the knowledge of Gracilariaceae from Japan II. On a new species of the genus Gracilariopsis, with some considerations on its ecology. Hokkaido Univ Collect Sch Acad Pap 271-279
Phooprong S, Ogawa H, Hayashizaki K (2007) Photosynthetic and respiratory responses of Gracilaria vermiculophylla (Ohmi) Papenfuss collected from Kumamoto, Shizuoka and Iwate, Japan. Ninet Int Seaweed Symp 20:293-300. https://doi.org/10.1007/978-1-4020-9619-8_37
Raikar S V., Iima M, Fujita Y (2001) Effect of temperature, salinity and light intensity on the growth of Gracilaria spp. (Gracilariales, Rhodophyta) from Japan, Malaysia and India. Indian J Mar Sci 30:98-104
Rueness J (2005) Life history and molecular sequences of Gracilaria vermiculophylla (Gracilariales, Rhodophyta), a new introduction to European waters. Phycologia 44:120-128. https://doi.org/10.2216/0031-8884(2005)44
Samanta P, Jang S, Shin S, Kim JK (2020) Effects of pH on growth and biochemical responses in Agarophyton vermiculophyllum under different temperature conditions. J Appl Phycol 32:499-509. https://doi.org/10.1007/S10811-019-01933-3/TABLES/1
Saunders GW (2009) Routine DNA barcoding of Canadian Gracilariales (Rhodophyta) reveals the invasive species Gracilaria vermiculophylla in British Columbia. Mol Ecol Resour 9:140-150. https://doi.org/10.1111/J.1755-0998.2009.02639.X
Schories D, Selig U, Schubert H (2009) Species and synonym list of the German marine macroalgae based on historical and recent records. Rostocker Meeresbiologische Beiträge 21:7-135
Schrofner EMNC (2020) Nutrient status of major Irish seaweed tides. Master's thesis, University of Algarve.
Sfriso A, Buosi A, Wolf MA, Sfriso AA (2020a) Invasion of alien macroalgae in the Venice Lagoon, a pest or a resource? Aquat Invasions 15:245-270. https://doi.org/10.3391/ai.2020.15.2.03
Sfriso A, Maistro S, Andreoli C, Moro I (2010) First record of Gracilaria vermiculophylla (Gracilariaceae, Rhodophyta) in the Po Delta lagoons, Mediterranean Sea (Italy). J Phycol 46:1024-1027. https://doi.org/10.1111/J.1529-8817.2010.00893.X
Sfriso A, Mistri M, Munari C, et al (2020b) Management and Exploitation of Macroalgal Biomass as a Tool for the Recovery of Transitional Water Systems. Front Ecol Evol 8:. https://doi.org/10.3389/FEVO.2020.00020/BIBTEX
Sfriso A, Wolf MA, Maistro S, et al (2012) Spreading and autoecology of the invasive species Gracilaria vermiculophylla (Gracilariales, Rhodophyta) in the lagoons of the north-western Adriatic Sea (Mediterranean Sea, Italy). Estuar Coast Shelf Sci 114:192-198. https://doi.org/10.1016/J.ECSS.2012.07.024
Skriptsova A V., Choi HG (2009) Taxonomic revision of Gracilaria "verrucosa" from the Russian Far East based on morphological and molecular data. Bot Mar 52:331-340. https://doi.org/10.1515/BOT.2009.008
Sousa AMM, Alves VD, Morais S, et al (2010) Agar extraction from integrated multitrophic aquacultured Gracilaria vermiculophylla: Evaluation of a microwave-assisted process using response surface methodology. Bioresour Technol 101:3258-3267. https://doi.org/10.1016/J.BIORTECH.2009.12.061
Surget G, Le Lann K, Delebecq G, et al (2017) Seasonal phenology and metabolomics of the introduced red macroalga Gracilaria vermiculophylla, monitored in the Bay of Brest (France). J Appl Phycol 29:2651-2666. https://doi.org/10.1007/S10811-017-1060-3/TABLES/2
Terada R, Yamamoto H (2002) Review of Gracilaria vermiculophylla and other species in Japan and Asia. In: Abbott IA (ed) Taxonomy of economic seaweeds with reference to some Pacific species, Vol 8. C. alifornia Sea Grant College Program, University of California, La Jolla, California, pp 215-224
Thomsen MS, Gurgel CFD, Fredericq S, McGlathery KJ (2005) Gracilaria vermiculophylla (Rhodophyta, Gracilariales) in Hog Island Bay, Virginia: a cryptic alien and invasive macroalga and taxonomic correction. J Phycol 42:139-141. https://doi.org/10.1111/J.1529-8817.2006.00160.X
Thomsen MS, McGlathery KJ, Schwarzschild A, Silliman BR (2009) Distribution and ecological role of the non-native macroalga Gracilaria vermiculophylla in Virginia salt marshes. Biol Invasions 11:2303-2316. https://doi.org/10.1007/S10530-008-9417-9/TABLES/4
Thomsen MS, McGlathery KJ, Tyler AC (2006) Macroalgal distribution patterns in a shallow, soft-bottom lagoon, with emphasis on the nonnative Gracilaria vermiculophylla and Codium fragile. Estuaries and Coasts 29:465-473. https://doi.org/10.1007/BF02784994
Thomsen MS, Staehr PA, Nejrup L, Schiel DR (2013) Effects of the invasive macroalgae Gracilaria vermiculophylla on two co-occurring foundation species and associated invertebrates. Aquat Invasions 8:133-145. https://doi.org/10.3391/ai.2013.8.2.02
Thomsen MS, Staehr PA, Nyberg CD, et al (2007a) Gracilaria vermiculophylla (Ohmi) Papenfuss, 1967 (Rhodophyta, Gracilariaceae) in northern Europe, with emphasis on Danish conditions, and what to expect in the future. Aquat Invasions 2:83-94. https://doi.org/10.3391/ai.2007.2.2.1
Thomsen MS, Wernberg T, Stæhr P, et al (2007b) Alien macroalgae in Denmark - a broad-scale national perspective. http://dx.doi.org/101080/17451000701213413 3:61-72. https://doi.org/10.1080/17451000701213413
Tyler AC, McGlathery KJ (2006) Uptake and release of nitrogen by the macroalgae Gracilaria vermiculophylla (Rhodophyta). J Phycol 42:515-525. https://doi.org/10.1111/J.1529-8817.2006.00224.X
van Ginneken V (2018) The Global Dispersal of the Non-Endemic Invasive Red Alga Gracilaria vermiculophylla in the Ecosystems of the Euro-Asia Coastal Waters Including the Wadden Sea Unesco World Heritage Coastal Area: Awful or Awesome? Oceanogr Fish Open access J 8:. https://doi.org/10.19080/ofoaj.2018.08.555727
Villanueva RD, Sousa AMM, Gonçalves MP, et al (2010) Production and properties of agar from the invasive marine alga, Gracilaria vermiculophylla (Gracilariales, Rhodophyta). J Appl Phycol 22:211-220. https://doi.org/10.1007/S10811-009-9444-7/FIGURES/2
Wang S, Wang G, Weinberger F, et al (2017) Anti-epiphyte defences in the red seaweed Gracilaria vermiculophylla: non-native algae are better defended than their native conspecifics. J Ecol 105:445-457. https://doi.org/10.1111/1365-2745.12694
Weinberger F, Buchholz B, Karez R, Wahl M (2008) The invasive red alga Gracilaria vermiculophylla in the Baltic Sea: adaptation to brackish water may compensate for light limitation. Aquat Biol 3:251-264. https://doi.org/10.3354/AB00083
Wilson Freshwater D, Montgomery F, Greene JK, et al (2006) Distribution and identification of an invasive Gracilaria species that is hampering commercial fishing operations in southeastern North Carolina, USA. Biol Invasions 8:631-637. https://doi.org/10.1007/S10530-005-1809-5
Wright JT, Byers JE, Devore JL, Sotka EE (2014) Engineering or food? mechanisms of facilitation by a habitat-forming invasive seaweed. Ecology 95:2699-2706. https://doi.org/10.1890/14-0127.1
Yokoya NS, Kakita H, Obika H, Kitamura T (1999) Effects of environmental factors and plant growth regulators on growth of the red alga Gracilaria vermiculophylla from Shikoku Island, Japan. Hydrobiologia 398:339-347
